# Supplementary material
Source: MDPI journal article supplement (https://www.mdpi.com/2304-6740/11/4/153)
Supplement: s1 [file s1 › inorganics-2265103-supplementary.pdf]

## Supplementary Materials

# Rational design of fullerene derivatives for improved stability of p-i-n perovskite solar cells

Victoria V. Ozerova <sup>1</sup>, Alexander V. Mumyatov <sup>1</sup>, Andrey Goryachev <sup>2</sup>, Ekaterina A. Khakina <sup>3,4</sup>, Alexander S. Peregudov <sup>3</sup>, Sergey M. Aldoshin <sup>1</sup> and Pavel Troshin <sup>1,\*</sup>

<sup>1</sup> Federal Research Center for Problems of Chemical Physics and Medicinal Chemistry, Russian Academy of Sciences, Academician Semenov Avenue 1, 142432 Chernogolovka, Moscow Region, Russia

<sup>2</sup> Ariel University, Physics Department, Ramat HaGolan St. 65, Ari'el, 40700, Israel

<sup>3</sup> A. N. Nesmeyanov Institute of Organoelement Compounds of Russian Academy of Sciences, Vavilova st. 28, Moscow, 119334, Russia

<sup>4</sup> National Research University Higher School of Economics, Vavilova st. 7, Moscow, 101000, Russia

\* Correspondence: troshin2003@inbox.ru

## Contents

**Figure S1.** HPLC traces of purified fullerene derivatives **F1-F8**. Phenomenex Luna 5u C18 (2) 100A, 4,6x150 mm analytical column, toluene (40%) – acetonitrile (60%) mixture used as eluent, flow rate 1 mL min<sup>-1</sup>

**Figure S2.** MALDI ToF mass spectra of purified fullerene derivatives **F1-F8**.

**Figure S3.** <sup>1</sup>H (a) and <sup>13</sup>C (b) NMR spectra of the fullerene derivative **F1**. Assignment of some signals is shown on the insets.

**Figure S4.** <sup>1</sup>H-<sup>1</sup>H COSY (a) and <sup>1</sup>H-<sup>13</sup>C HSQC (b) NMR spectra of the fullerene derivative **F1** (CDCl<sub>3</sub>).

**Figure S5.** <sup>1</sup>H (a) and <sup>13</sup>C (b) NMR spectra of the fullerene derivative **F2**. Assignment of some signals is shown on the insets.

**Figure S6.** <sup>1</sup>H-<sup>1</sup>H COSY (a) and <sup>1</sup>H-<sup>13</sup>C HMQC (b) NMR spectra of the fullerene derivative **F2** (CDCl<sub>3</sub>).

**Figure S7.** <sup>1</sup>H (a) and <sup>13</sup>C (b) NMR spectra of the fullerene derivative **F3**. Assignment of some signals is shown on the insets.

**Figure S8.** <sup>1</sup>H-<sup>1</sup>H COSY (a) and <sup>1</sup>H-<sup>13</sup>C HMQC (b) NMR spectra of the fullerene derivative **F3** (CDCl<sub>3</sub>).

**Figure S9.** <sup>1</sup>H (a), <sup>13</sup>C (b) and <sup>19</sup>F (c) NMR spectra of the fullerene derivative **F4**. Assignment of some signals is shown on the insets.

**Figure S10.** <sup>1</sup>H-<sup>1</sup>H COSY (a) and <sup>1</sup>H-<sup>13</sup>C HMQC (b) NMR spectra of the fullerene derivative **F4** (CDCl<sub>3</sub>).

**Figure S11.** <sup>1</sup>H (a) and <sup>13</sup>C (b) NMR spectra of the fullerene derivative **F5**. Assignment of some signals is shown on the insets.

**Figure S12.** <sup>1</sup>H-<sup>1</sup>H COSY (a) and <sup>1</sup>H-<sup>13</sup>C HMQC (b) NMR spectra of the fullerene derivative **F5** (CDCl<sub>3</sub>).

**Figure S13.** <sup>1</sup>H (a) and <sup>13</sup>C (b) NMR spectra of the fullerene derivative **F6**. Assignment of some signals is shown on the insets.

**Figure S14.** <sup>1</sup>H-<sup>1</sup>H COSY (a) and <sup>1</sup>H-<sup>13</sup>C HMQC (b) NMR spectra of the fullerene derivative **F6** (CDCl<sub>3</sub>).

**Figure S15.** <sup>1</sup>H (a) and <sup>13</sup>C (b) NMR spectra of the fullerene derivative **F7**. Assignment of some signals is shown on the insets.

**Figure S16.** <sup>1</sup>H-<sup>13</sup>C HSQC NMR spectrum of the fullerene derivative **F7** (CDCl<sub>3</sub>).

**Figure S17.**  $^1\text{H}$  (a) and  $^{13}\text{C}$  (b) NMR spectra of the fullerene derivative **F8**. Assignment of some signals is shown on the insets.

**Figure S18.**  $^1\text{H}$ - $^1\text{H}$  COSY (a) and  $^1\text{H}$ - $^{13}\text{C}$  HMQC (b) NMR spectra of the fullerene derivative **F8** ( $\text{CDCl}_3$ ).

**Figure S19.** PL spectra of the lead halide perovskite films before (black line) and after (red line) deposition of fullerene-based ETLs.

**Figure S20.** Overview of perovskite/ETL bilayer stack morphology: topography (left column) and IR s-SNOM images recorded at the characteristic frequencies of the ETL material (middle column) and perovskite absorber (right column). The used fullerene derivatives are listed on the left side.

**Figure S21.** Dependence of the perovskite solar cell parameters on the deposition rate of the fullerene derivative **F1** ( $20.2 \text{ mg mL}^{-1}$  solution in chlorobenzene) used to form electron transport layer in the devices

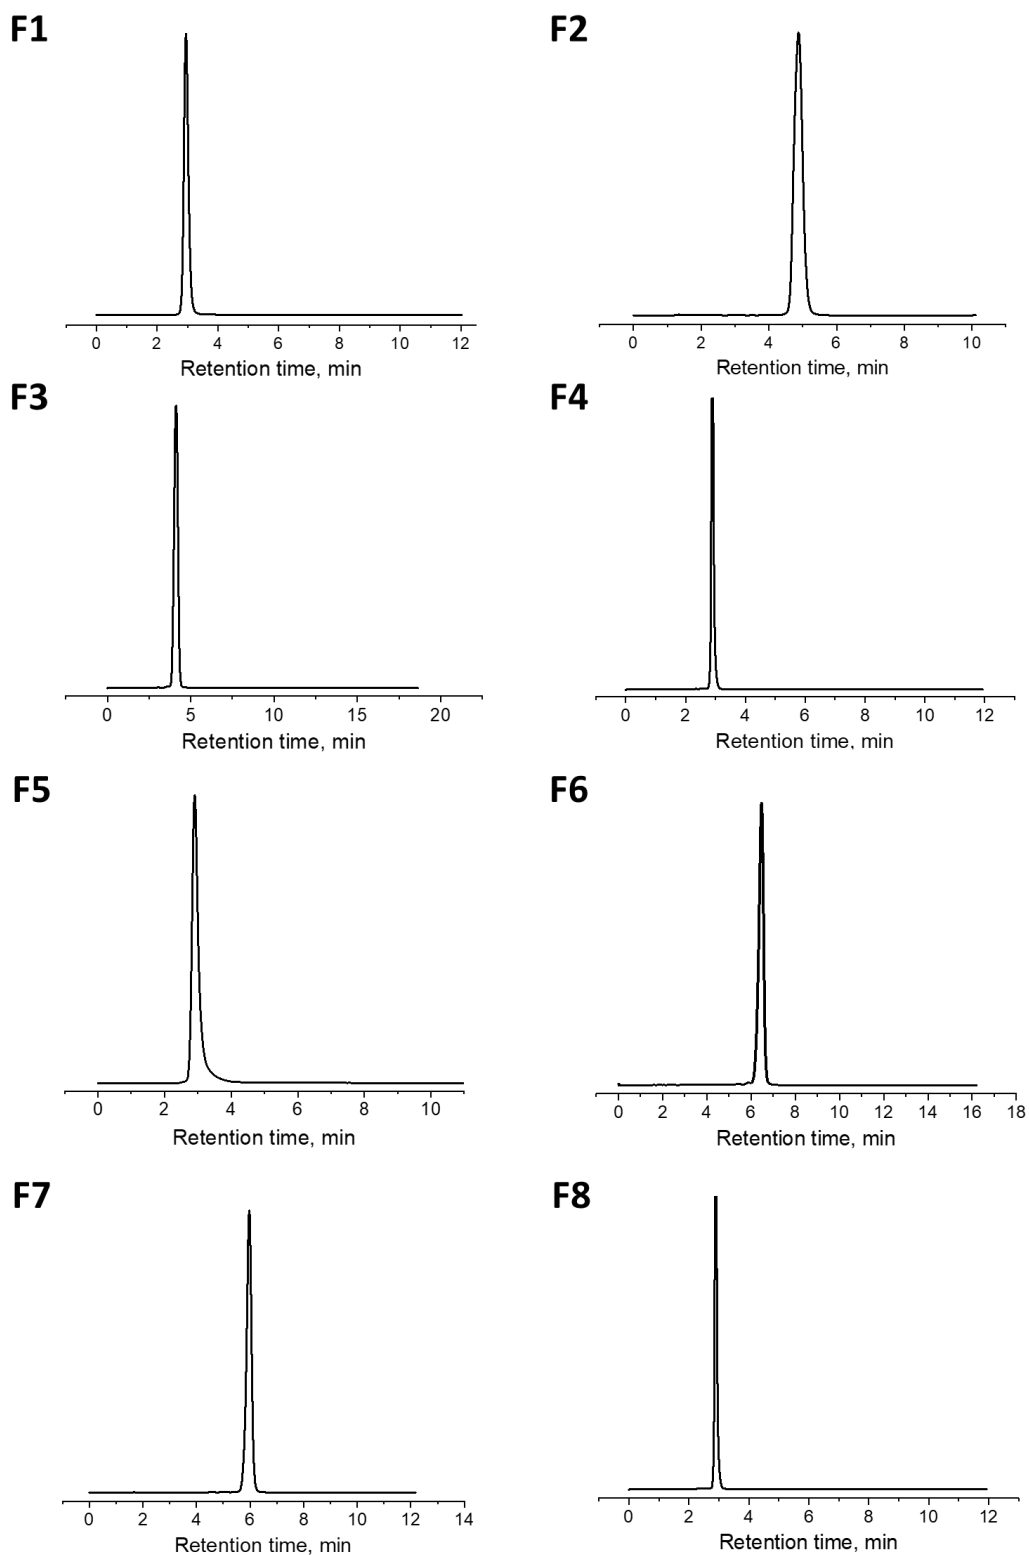

**Figure S1.** HPLC traces of purified fullerene derivatives **F1-F8**. Phenomenex Luna 5u C18 (2) 100A, 4,6x150 mm analytical column, toluene (40%) – acetonitrile (60%) mixture used as eluent, flow rate 1 mL min<sup>-1</sup>

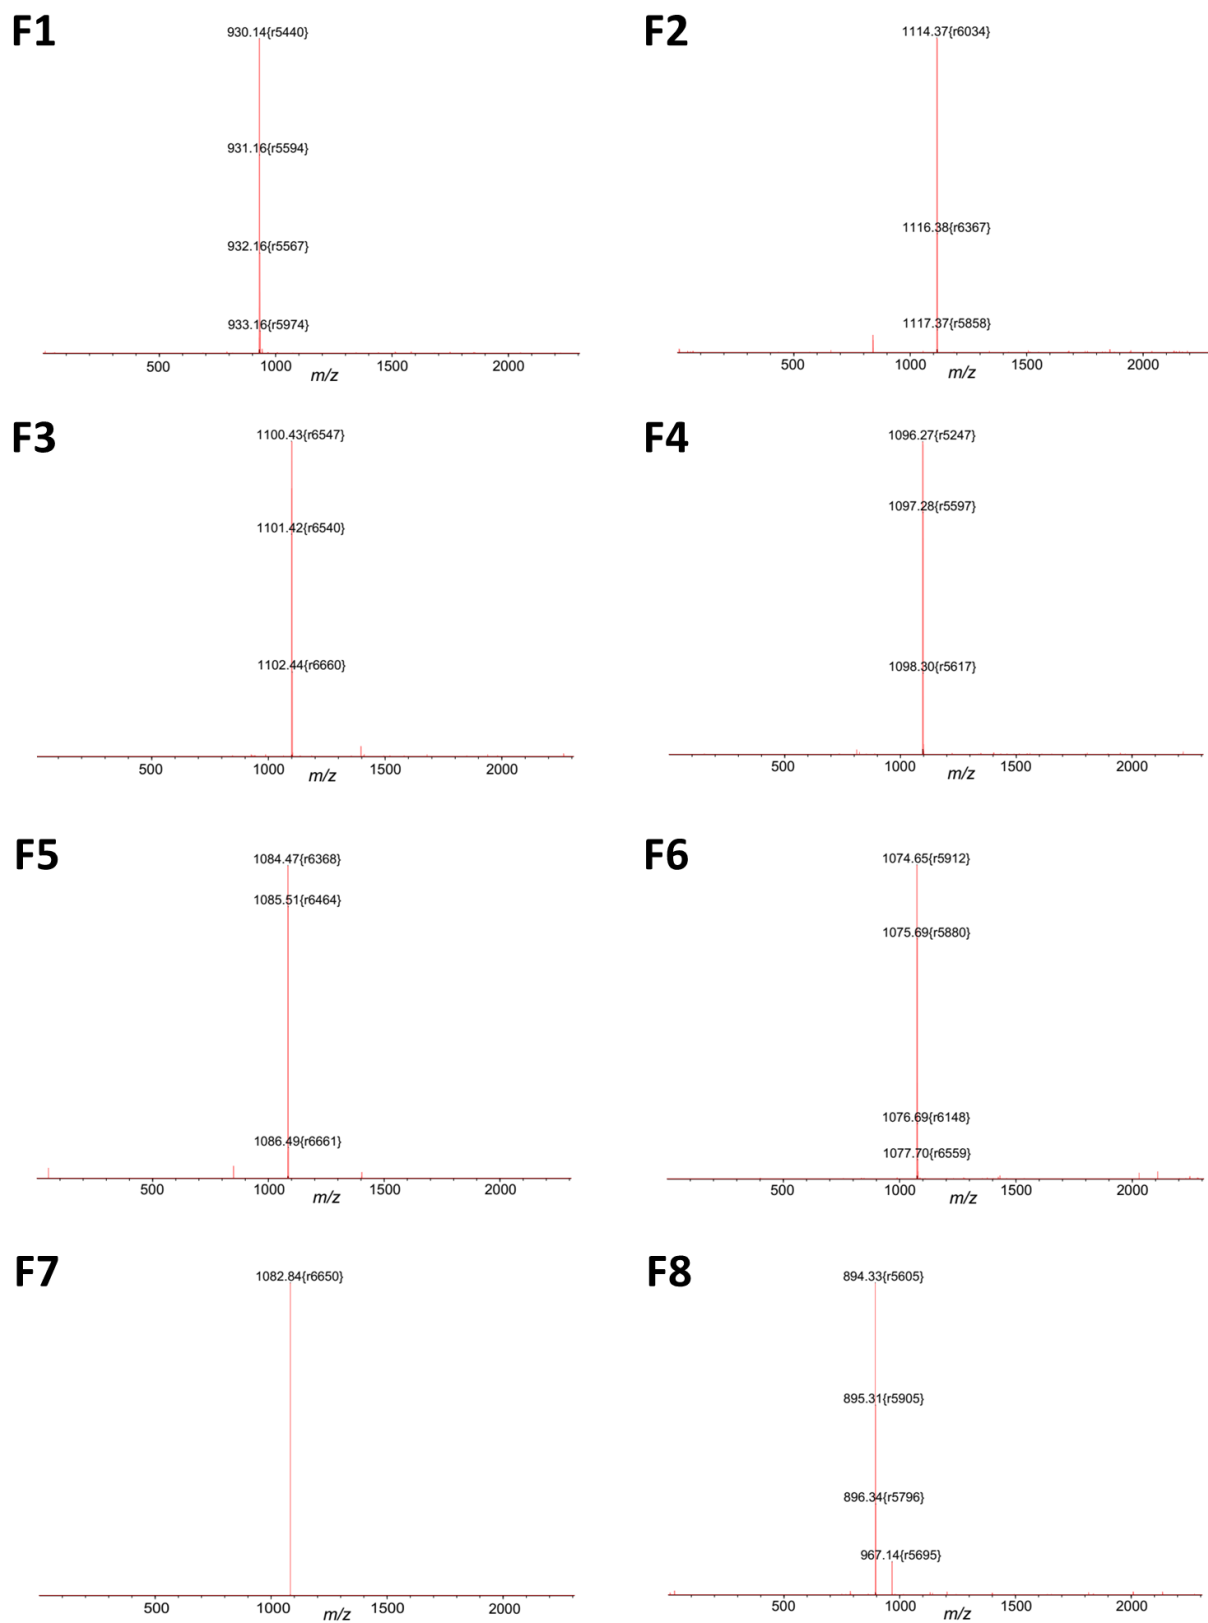

**Figure S2.** MALDI ToF mass spectra of purified fullerene derivatives **F1-F8**.

a

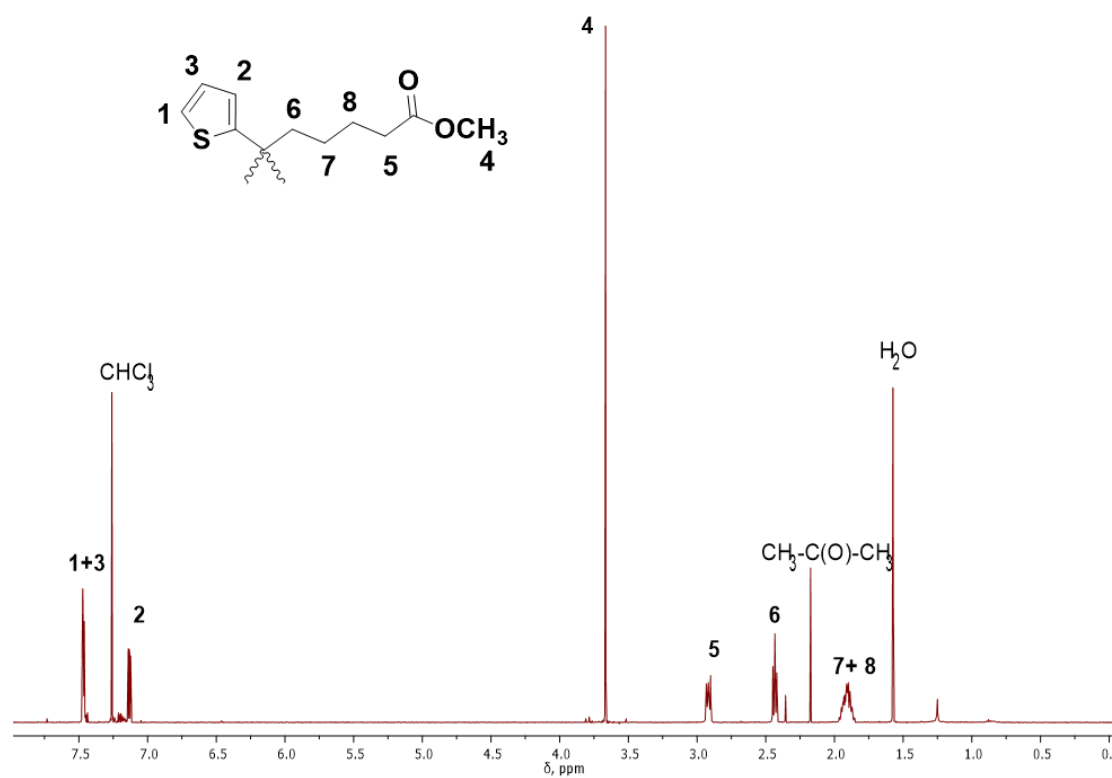

b

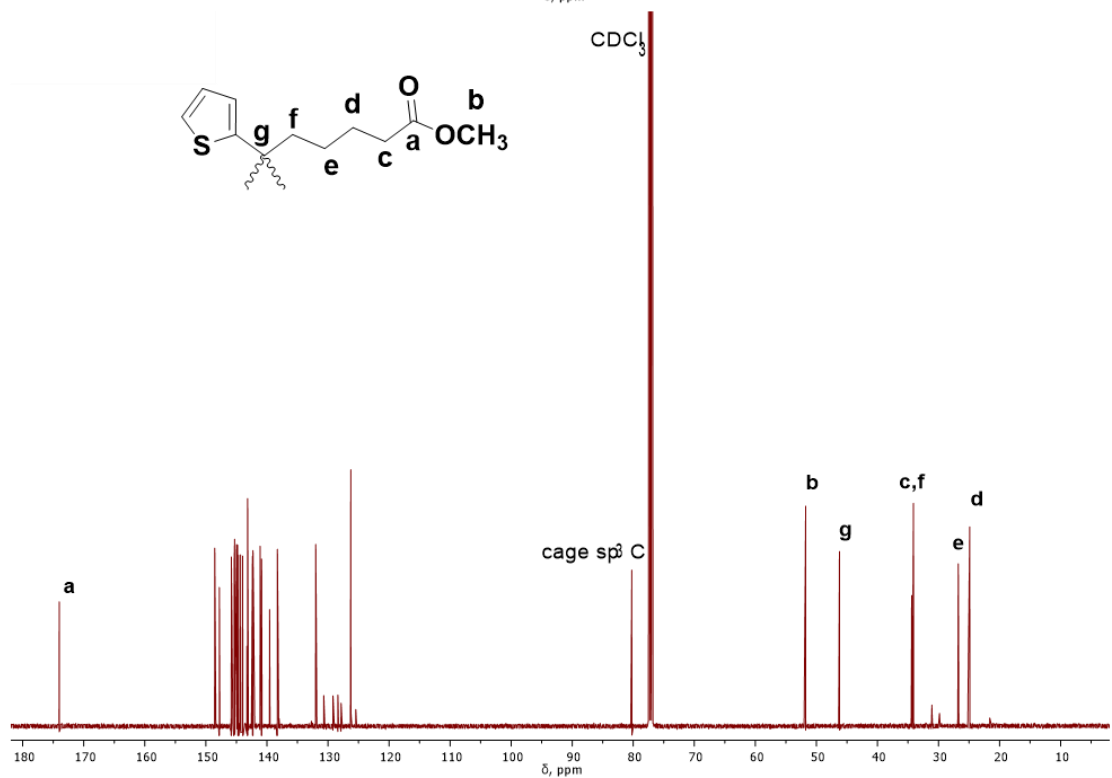

**Figure S3.** <sup>1</sup>H (a) and <sup>13</sup>C (b) NMR spectra of the fullerene derivative **F1**. Assignment of some signals is shown on the insets.

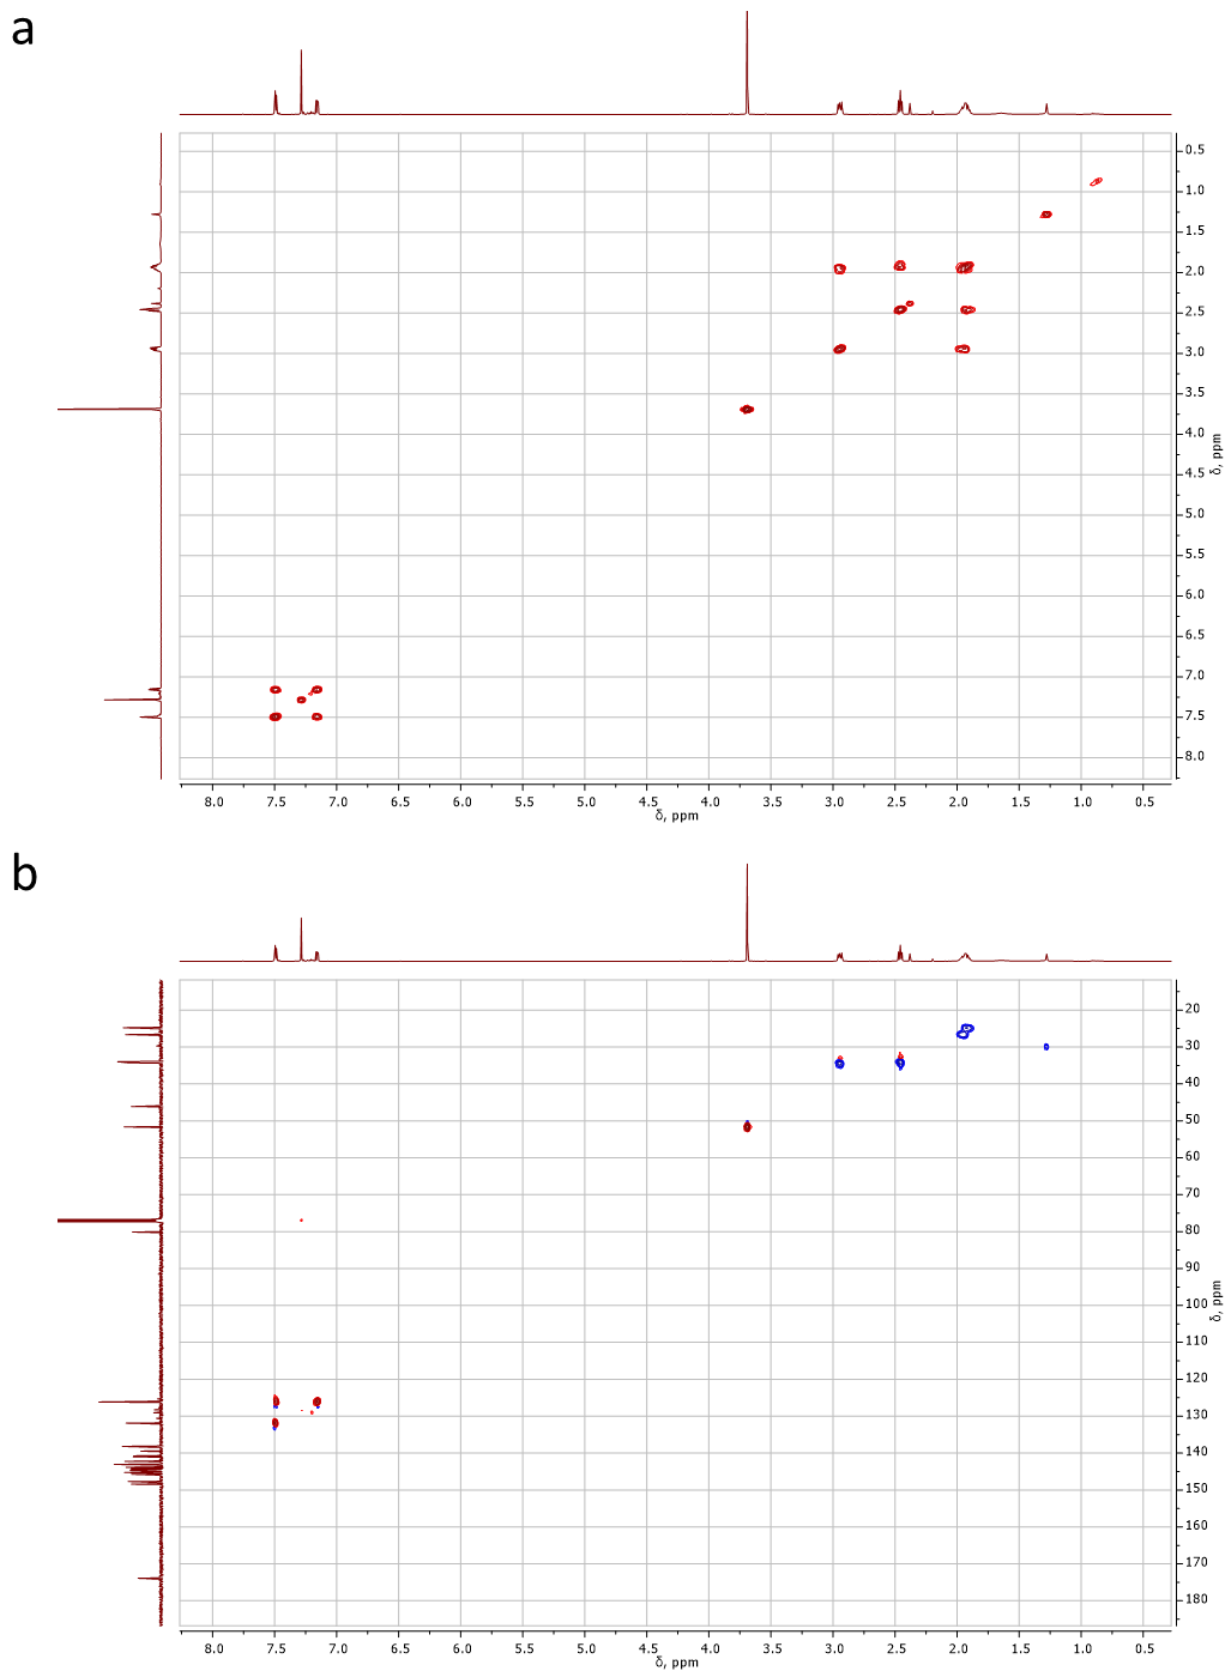

**Figure S4.**  $^1\text{H}$ - $^1\text{H}$  COSY (a) and  $^1\text{H}$ - $^{13}\text{C}$  HSQC (b) NMR spectra of the fullerene derivative **F1** ( $\text{CDCl}_3$ ).

a

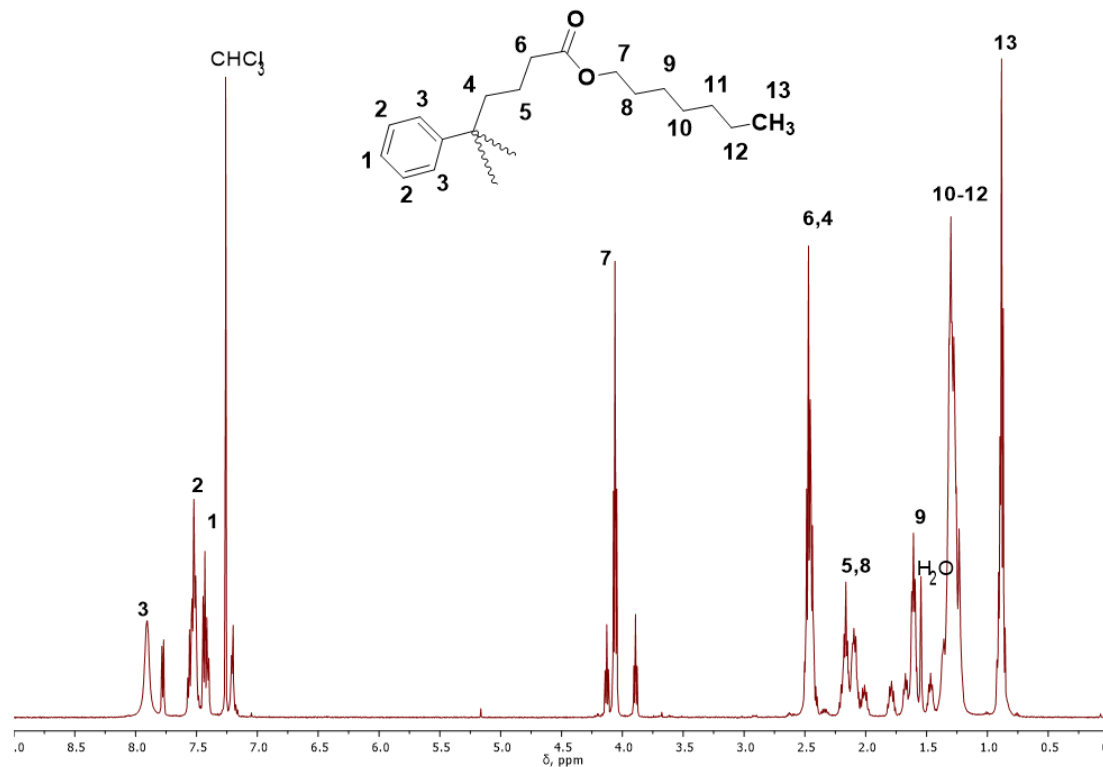

b

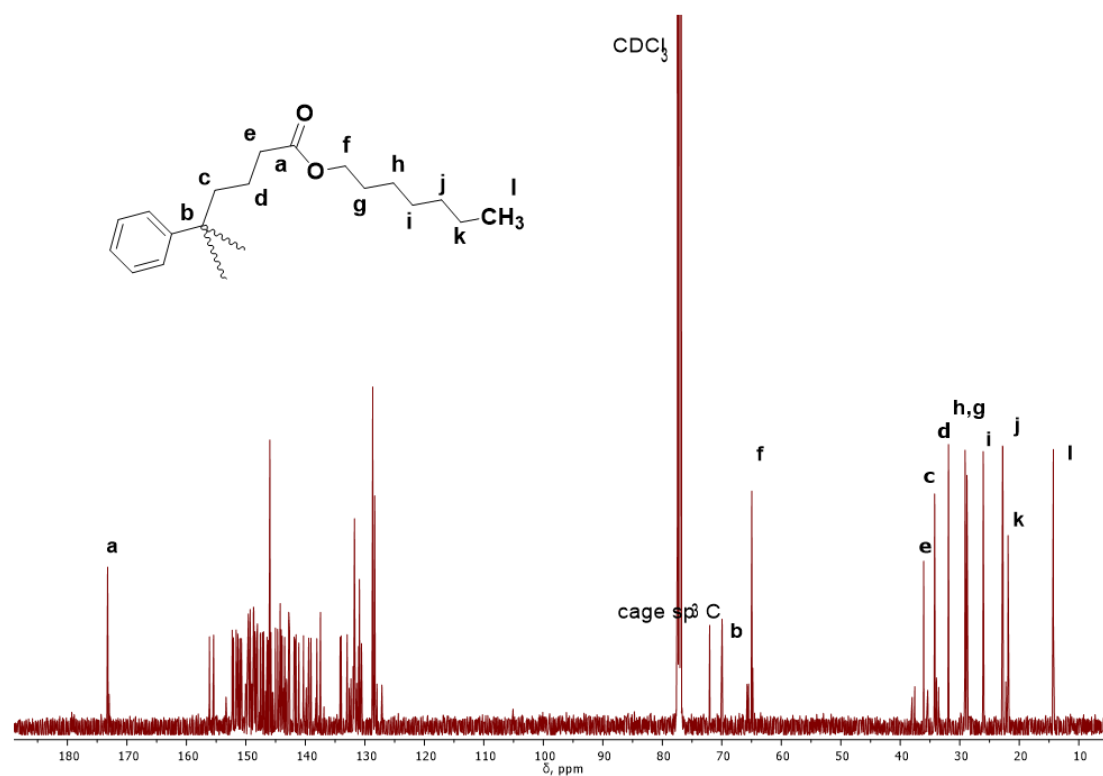

**Figure S5.** <sup>1</sup>H (a) and <sup>13</sup>C (b) NMR spectra of the fullerene derivative **F2**. Assignment of some signals is shown on the insets.

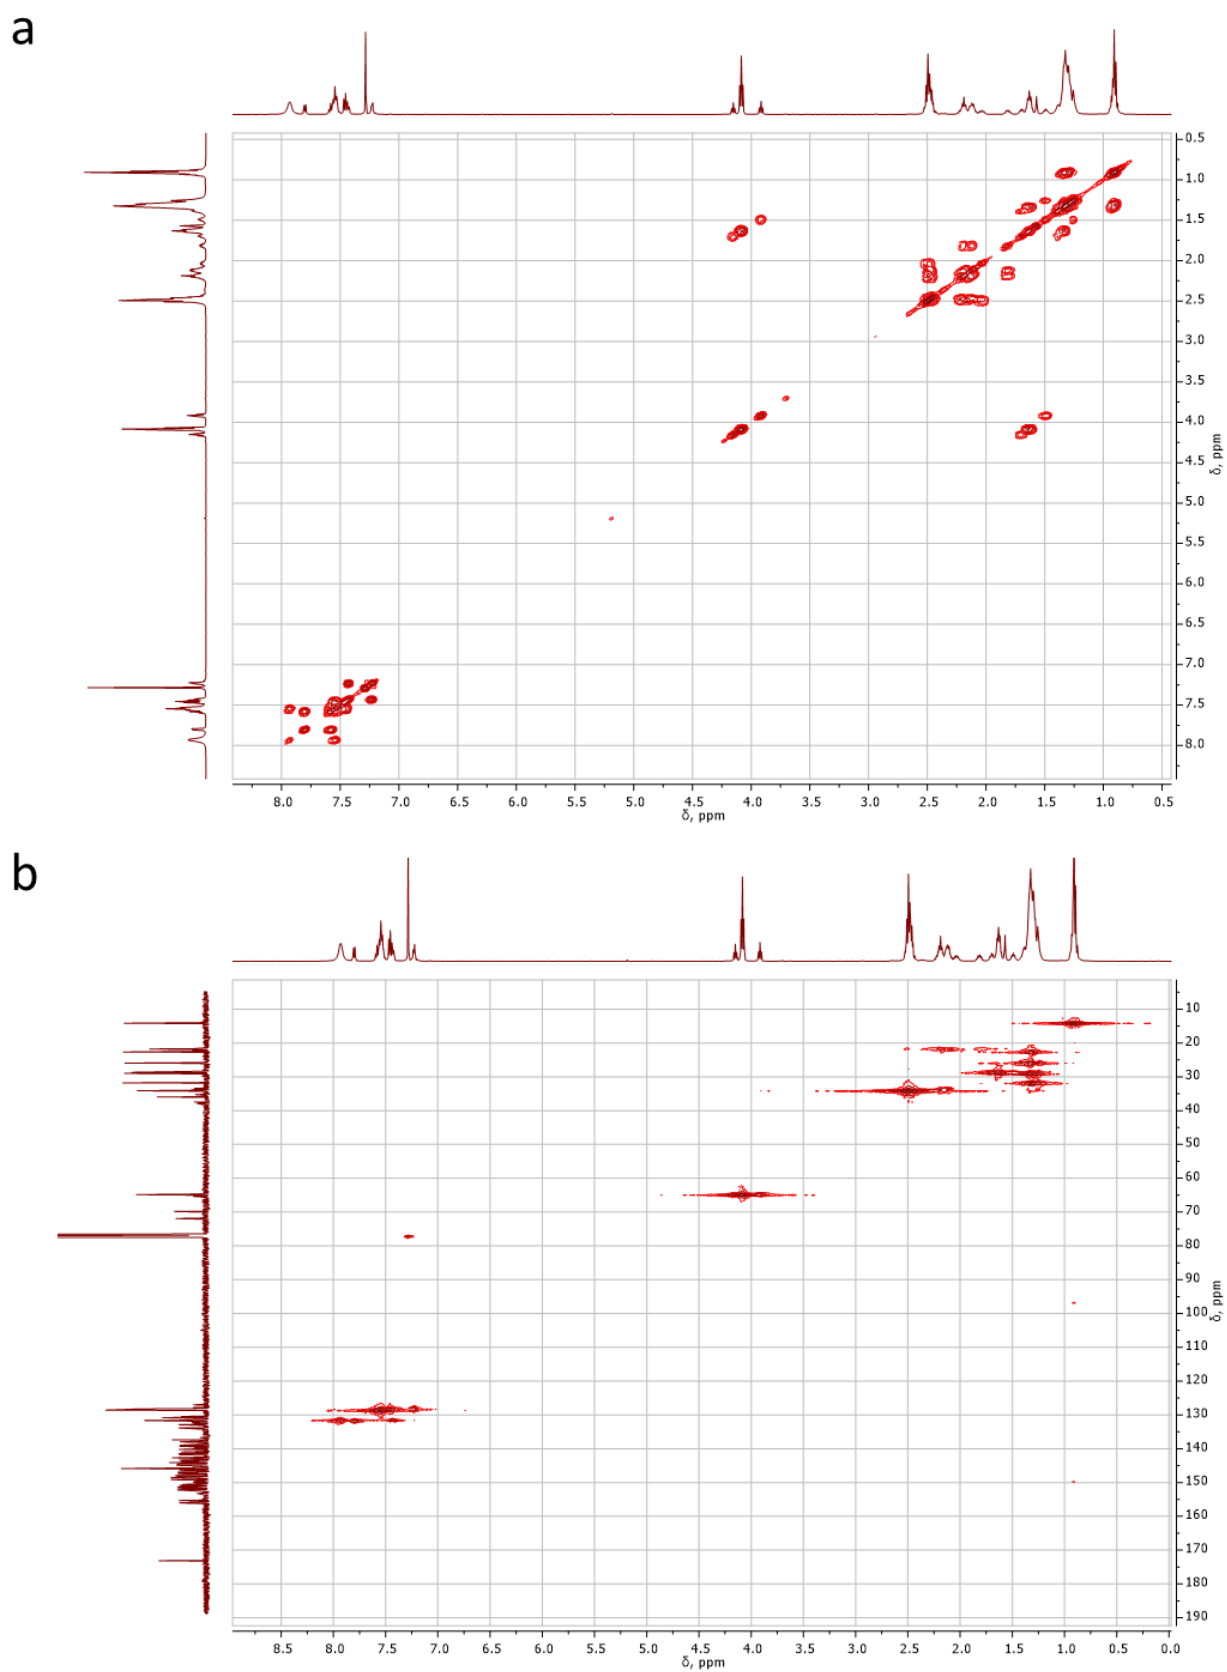

**Figure S6.**  $^1\text{H}$ - $^1\text{H}$  COSY (a) and  $^1\text{H}$ - $^{13}\text{C}$  HMQC (b) NMR spectra of the fullerene derivative **F2** ( $\text{CDCl}_3$ ).

a

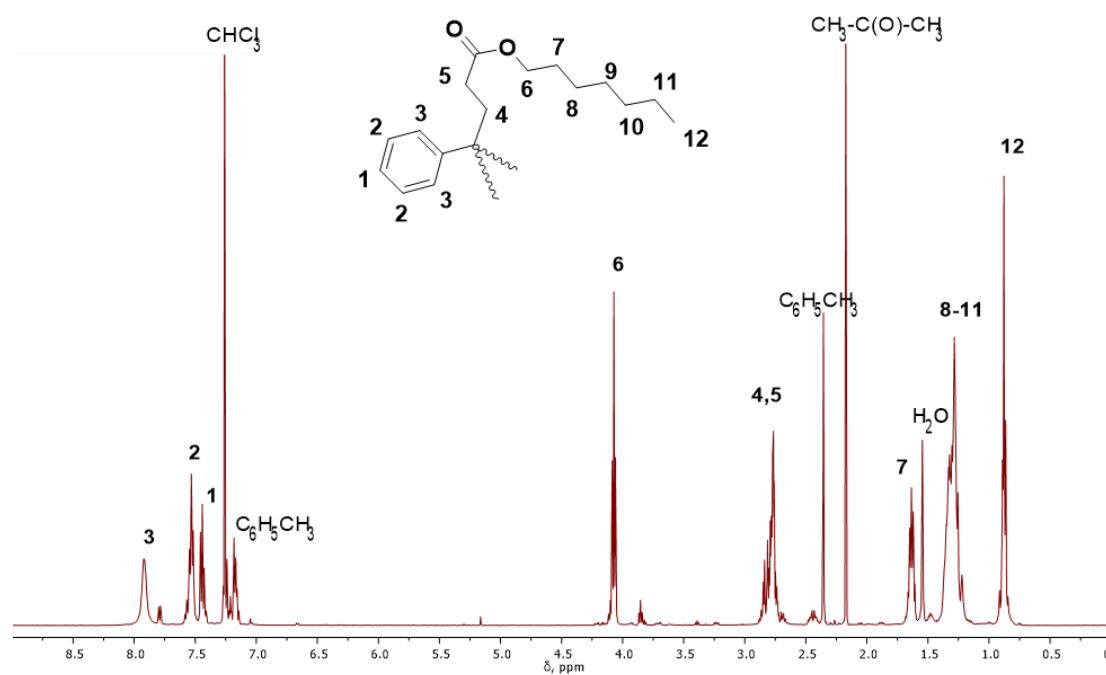

b

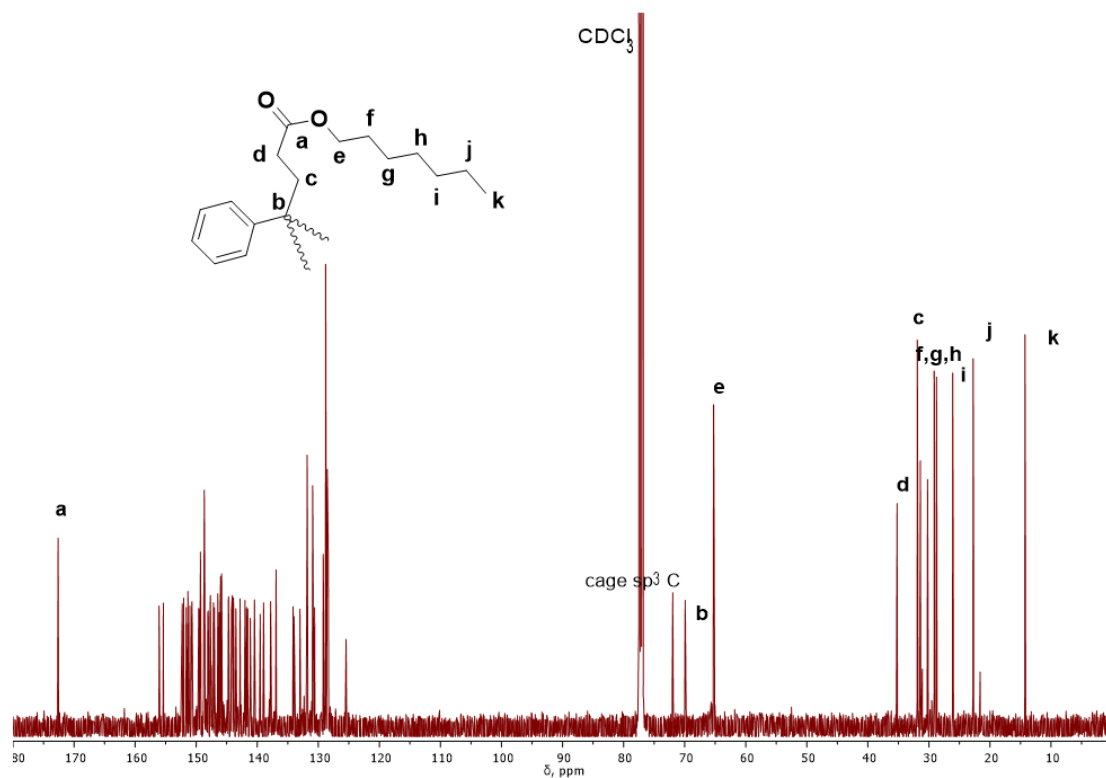

**Figure S7.**  $^1\text{H}$  (a) and  $^{13}\text{C}$  (b) NMR spectra of the fullerene derivative **F3**. Assignment of some signals is shown on the insets.

a

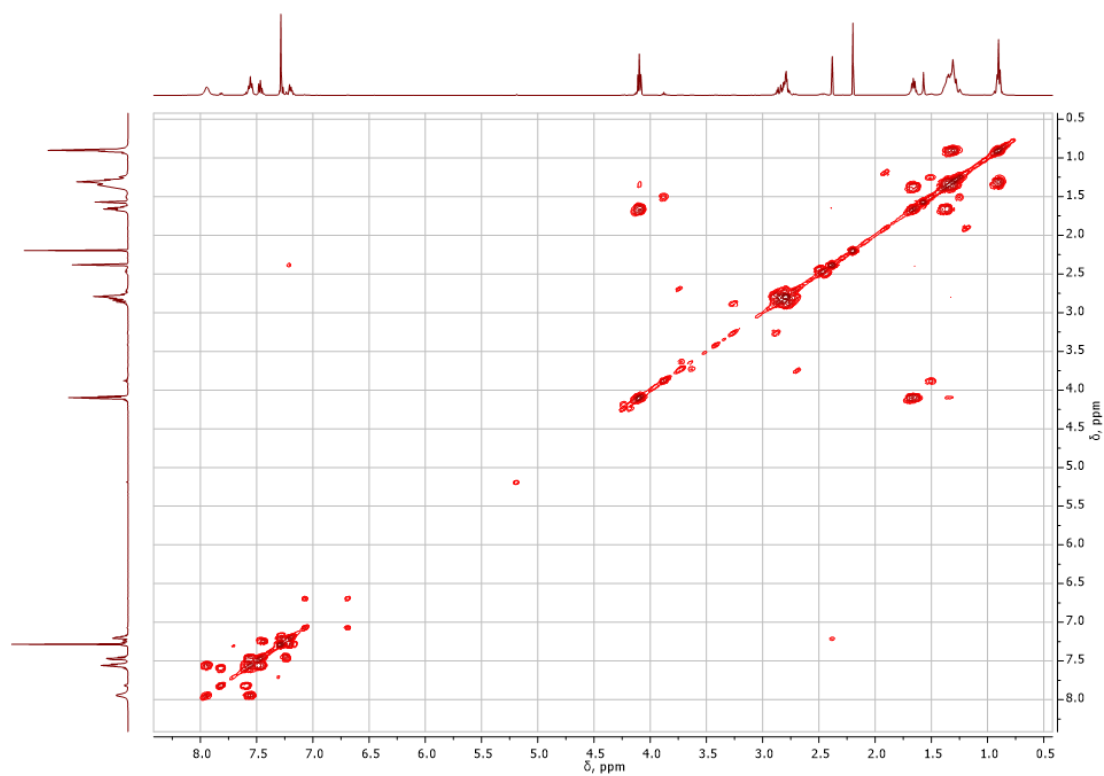

b

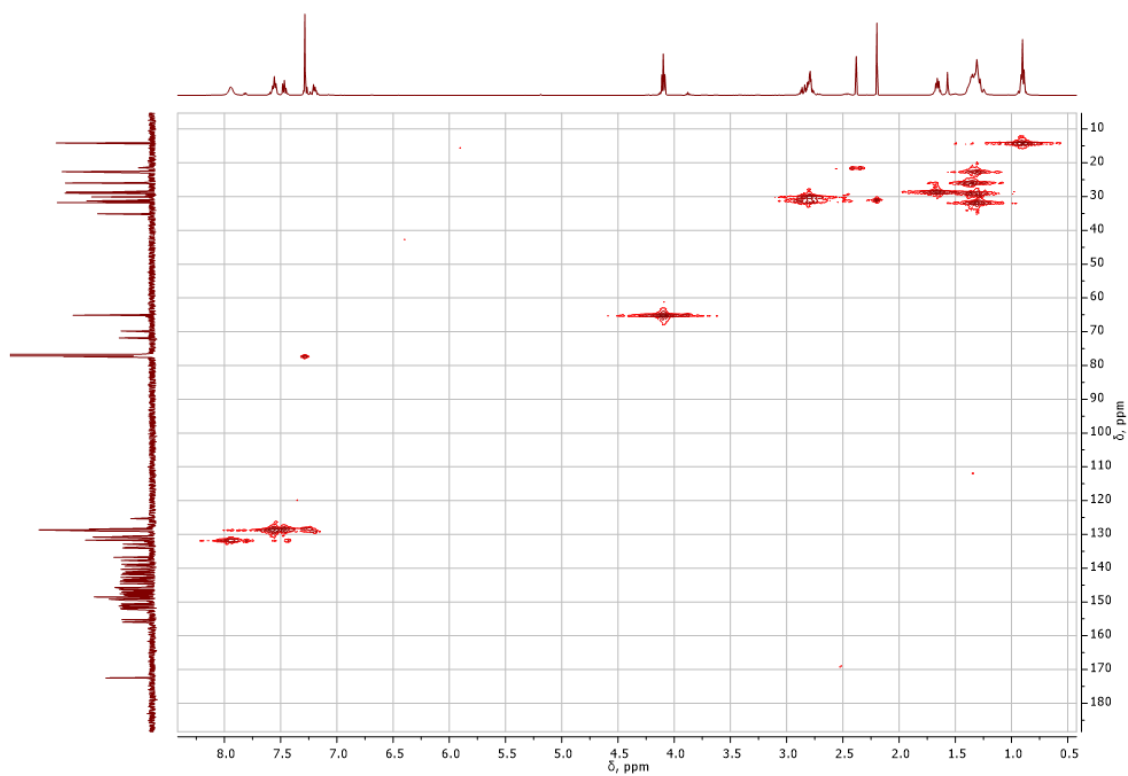

**Figure S8.**  $^1\text{H}$ - $^1\text{H}$  COSY (a) and  $^1\text{H}$ - $^{13}\text{C}$  HMQC (b) NMR spectra of the fullerene derivative **F3** ( $\text{CDCl}_3$ ).

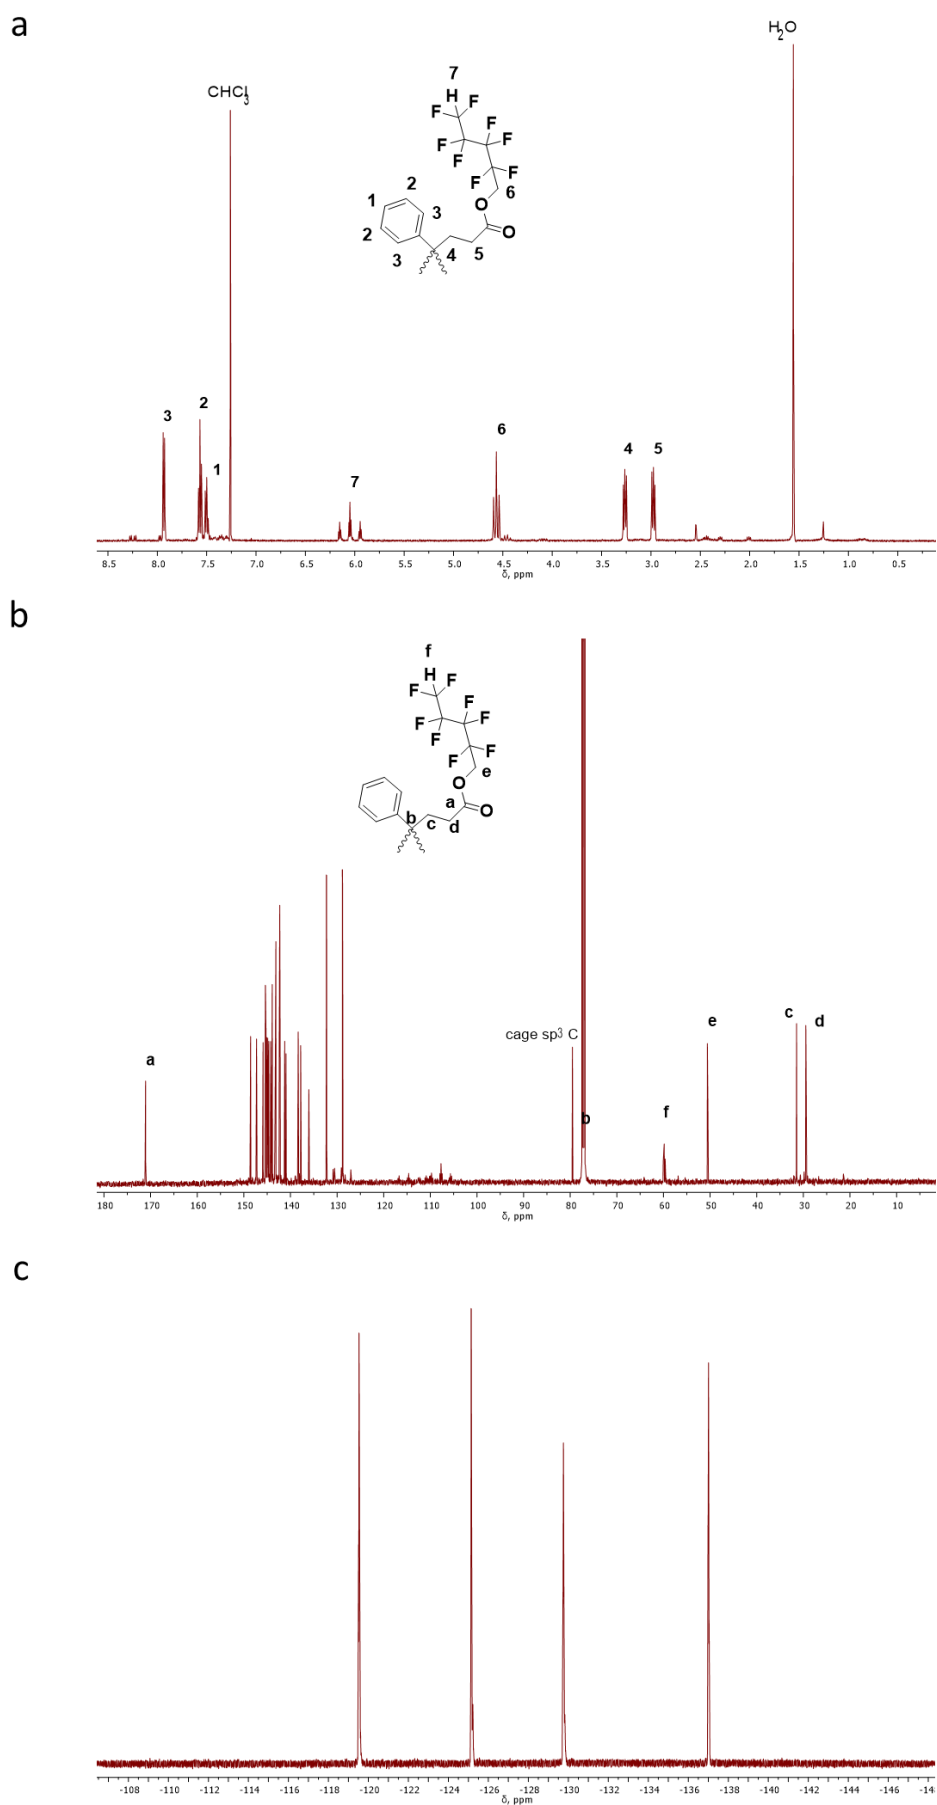

**Figure S9.**  $^1\text{H}$  (a),  $^{13}\text{C}$  (b) and  $^{19}\text{F}$  (c) NMR spectra of the fullerene derivative **F4**. Assignment of some signals is shown on the insets.

a

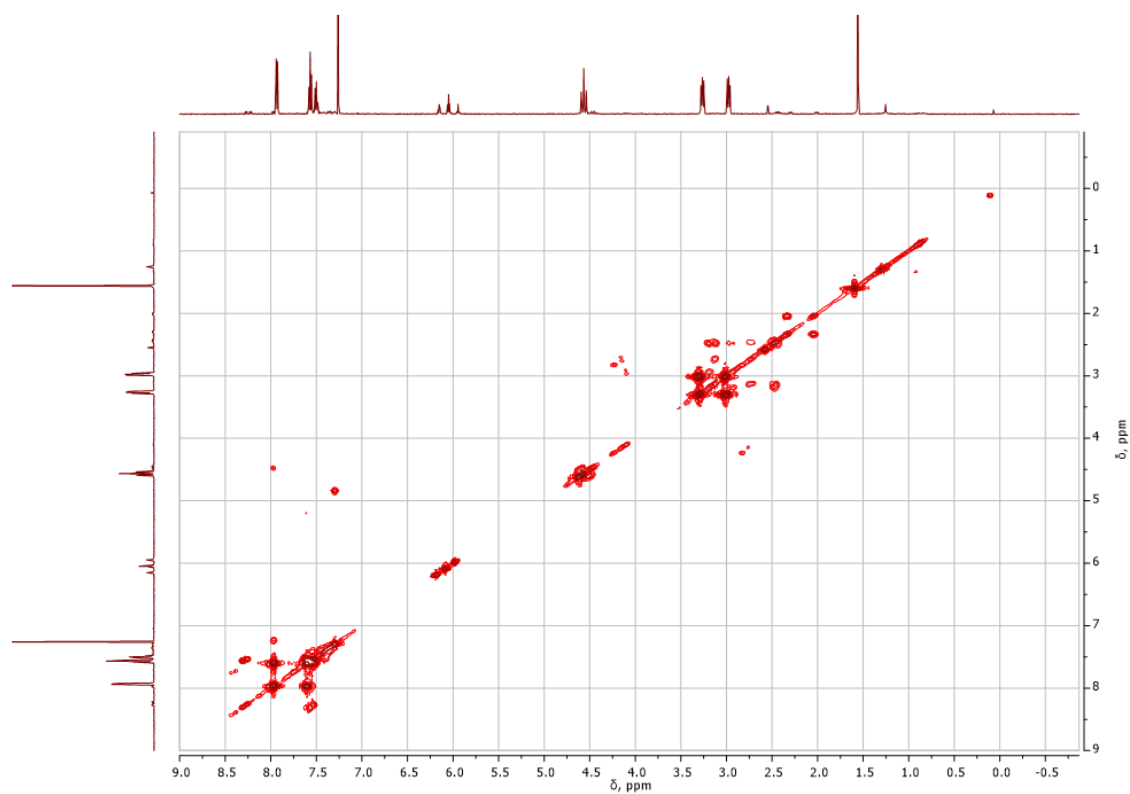

b

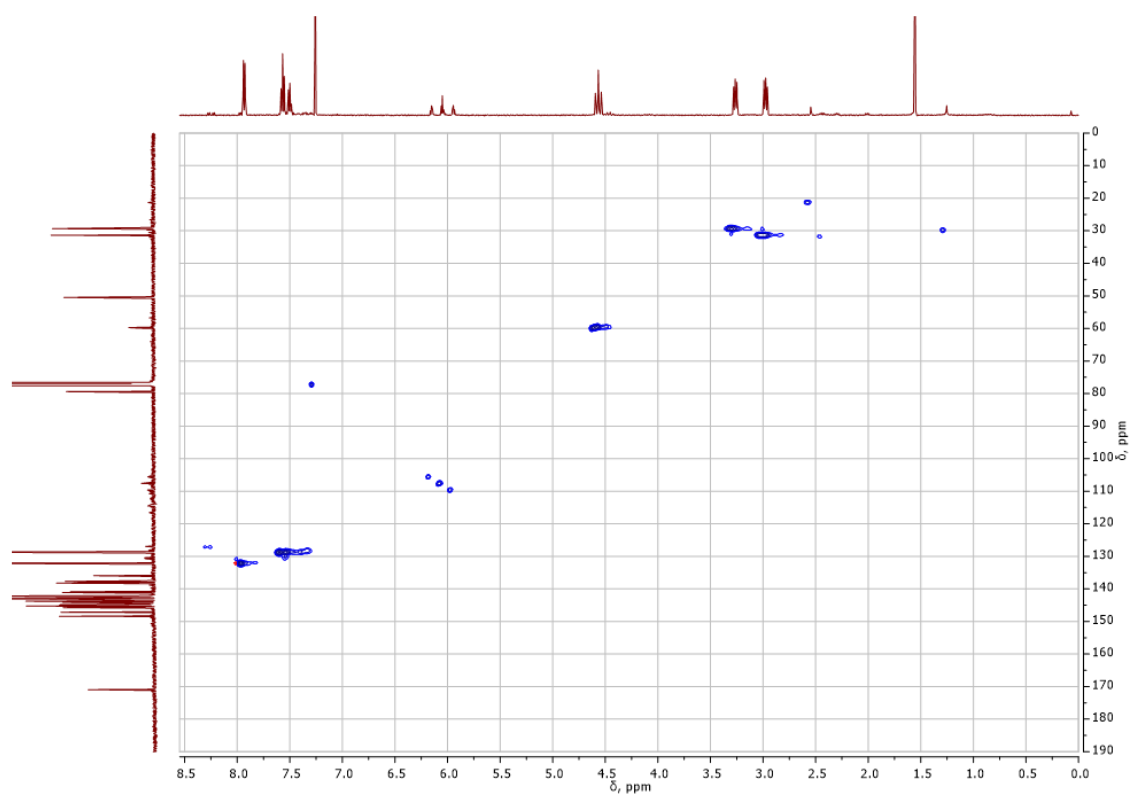

**Figure S10.**  $^1\text{H}$ - $^1\text{H}$  COSY (a) and  $^1\text{H}$ - $^{13}\text{C}$  HMQC (b) NMR spectra of the fullerene derivative **F4** ( $\text{CDCl}_3$ ).

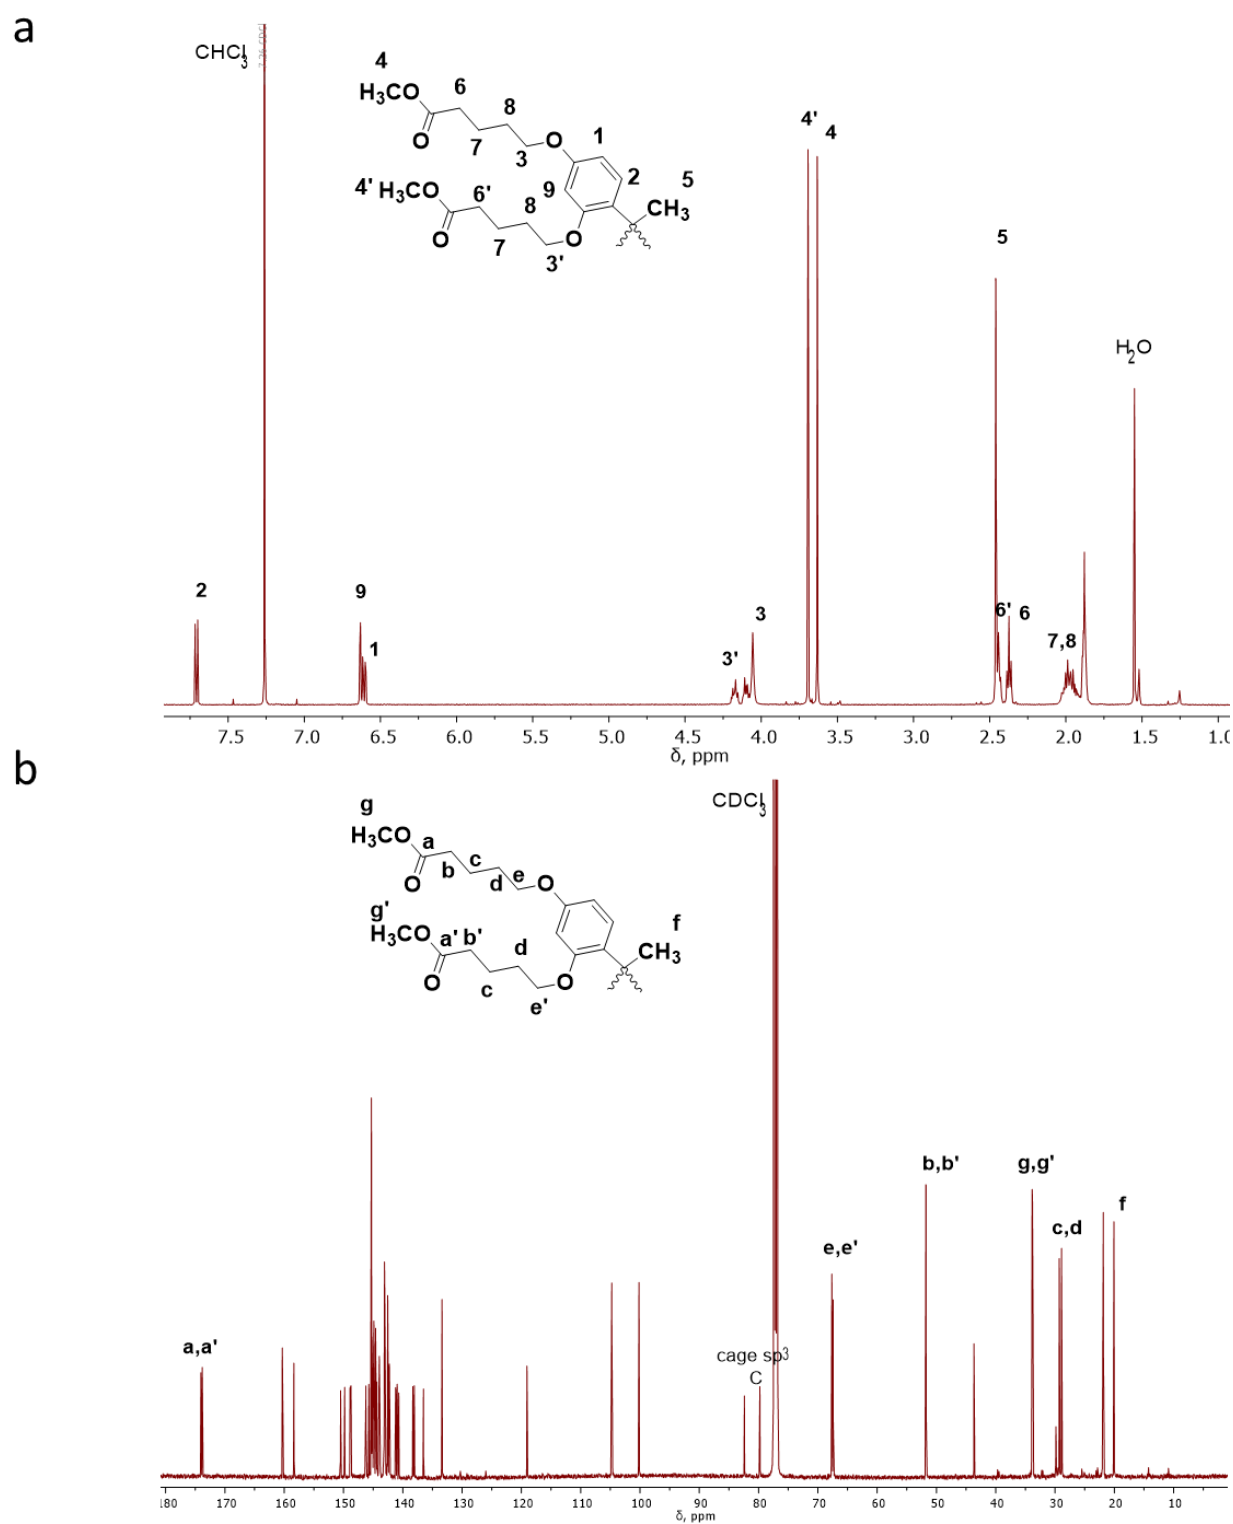

**Figure S11.**  $^1\text{H}$  (a) and  $^{13}\text{C}$  (b) NMR spectra of the fullerene derivative **F5**. Assignment of some signals is shown on the insets.

a

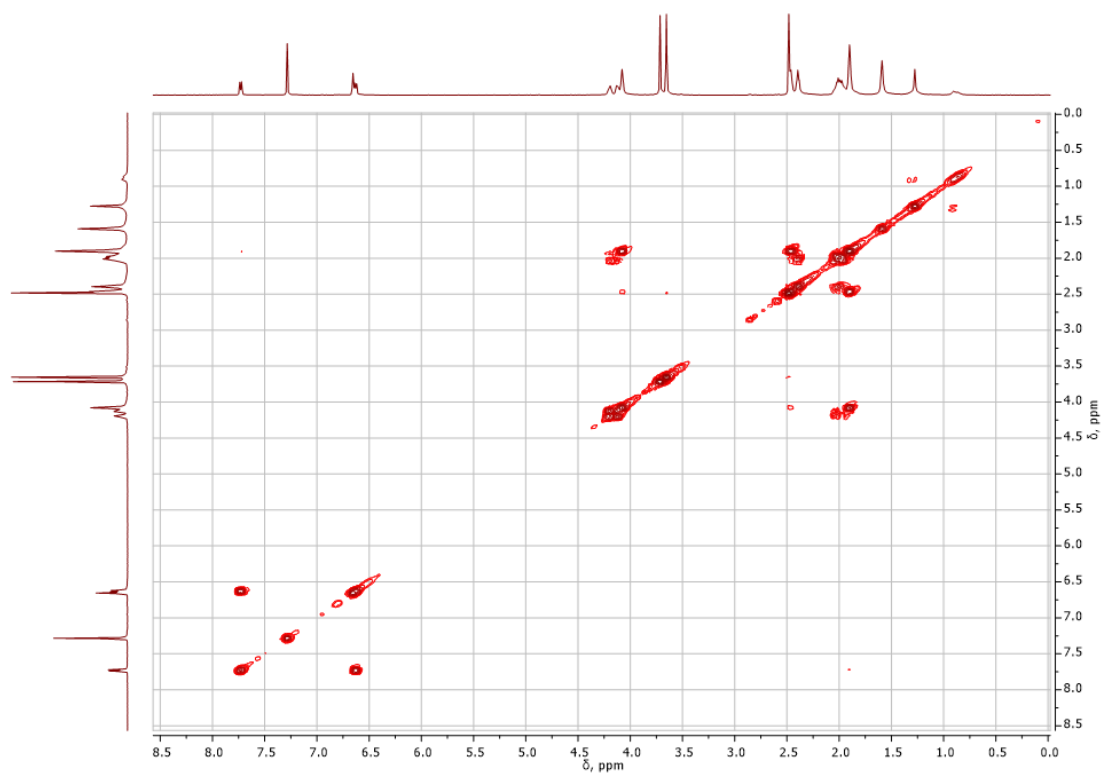

b

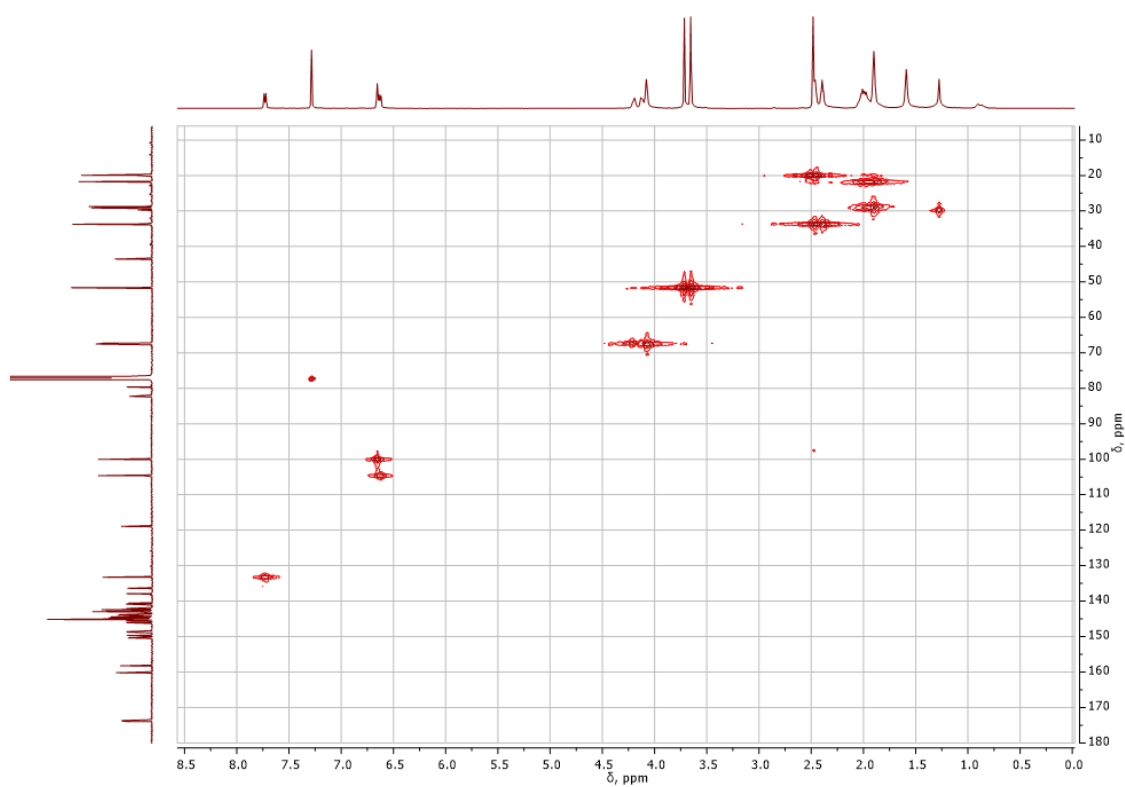

**Figure S12.**  $^1\text{H}$ - $^1\text{H}$  COSY (a) and  $^1\text{H}$ - $^{13}\text{C}$  HMQC (b) NMR spectra of the fullerene derivative **F5** ( $\text{CDCl}_3$ ).

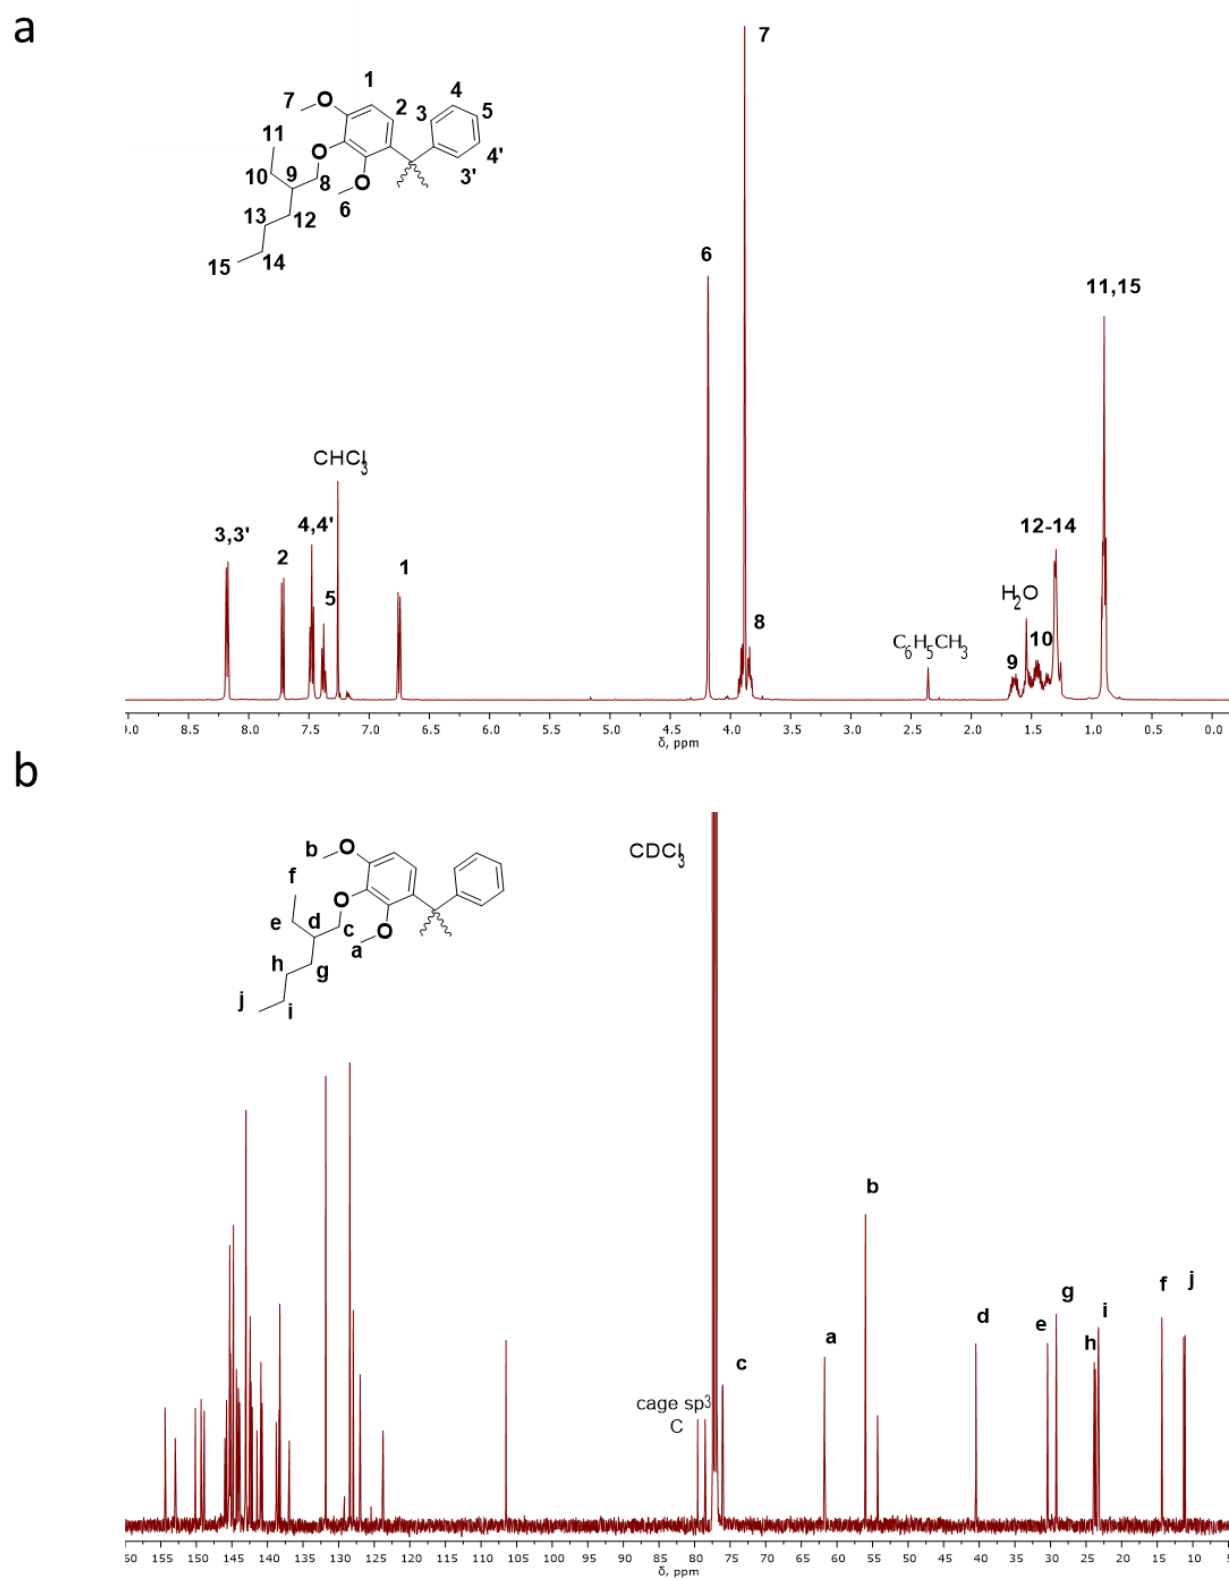

**Figure S13.**  $^1\text{H}$  (a) and  $^{13}\text{C}$  (b) NMR spectra of the fullerene derivative **F6**. Assignment of some signals is shown on the insets.

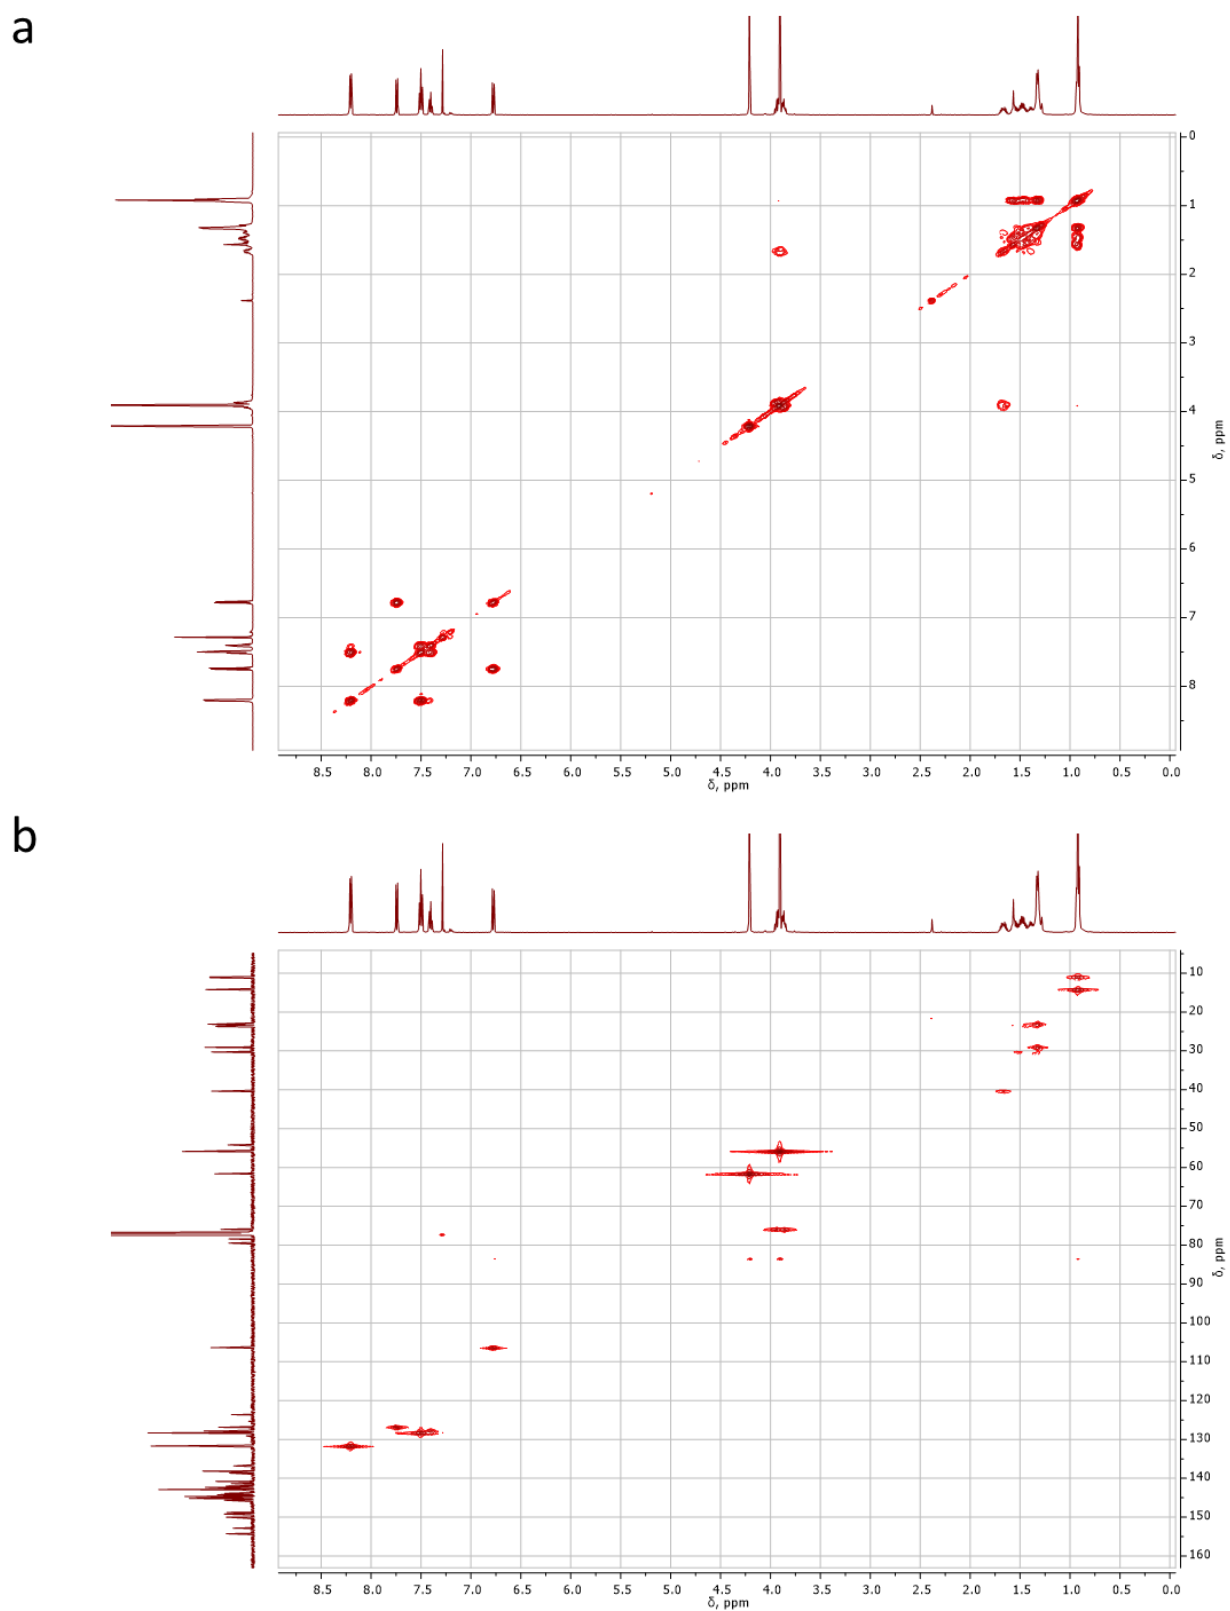

**Figure S14.** <sup>1</sup>H-<sup>1</sup>H COSY (a) and <sup>1</sup>H-<sup>13</sup>C HMQC (b) NMR spectra of the fullerene derivative **F6** (CDCl<sub>3</sub>).

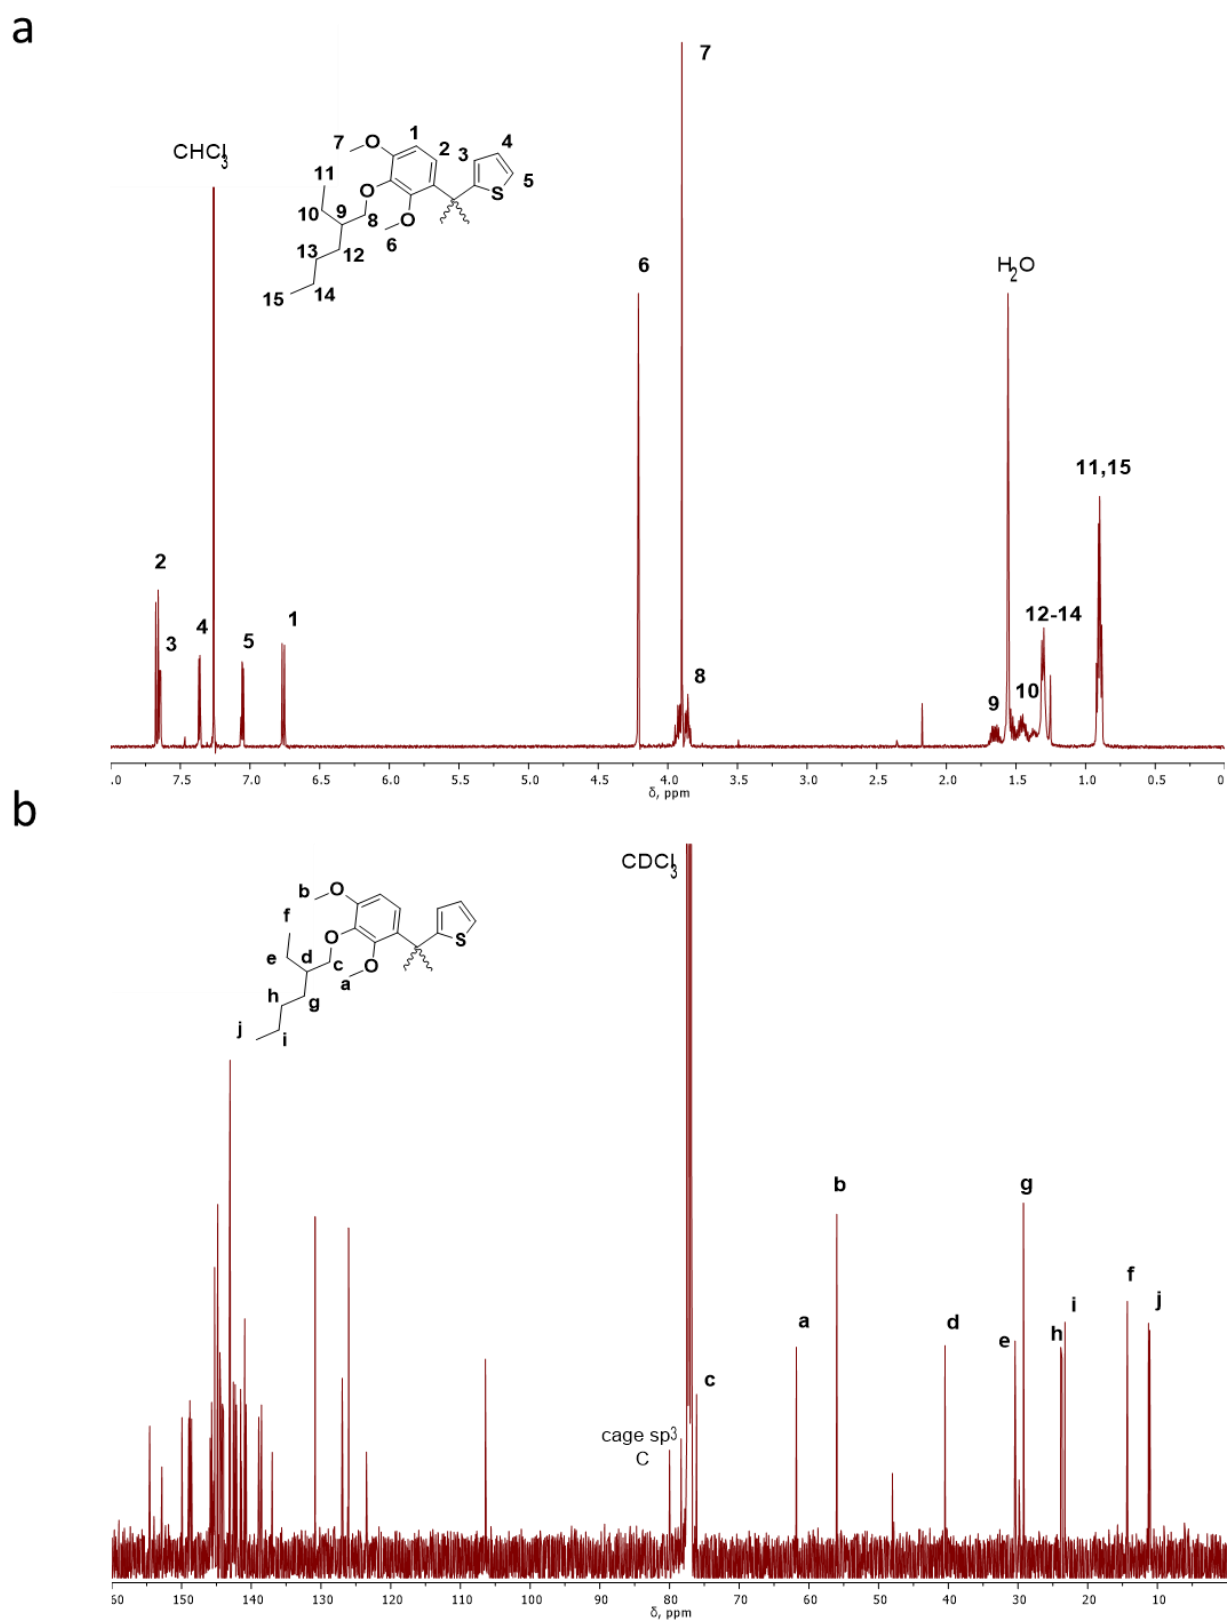

**Figure S15.**  $^1\text{H}$  (a) and  $^{13}\text{C}$  (b) NMR spectra of the fullerene derivative **F7**. Assignment of some signals is shown on the insets.

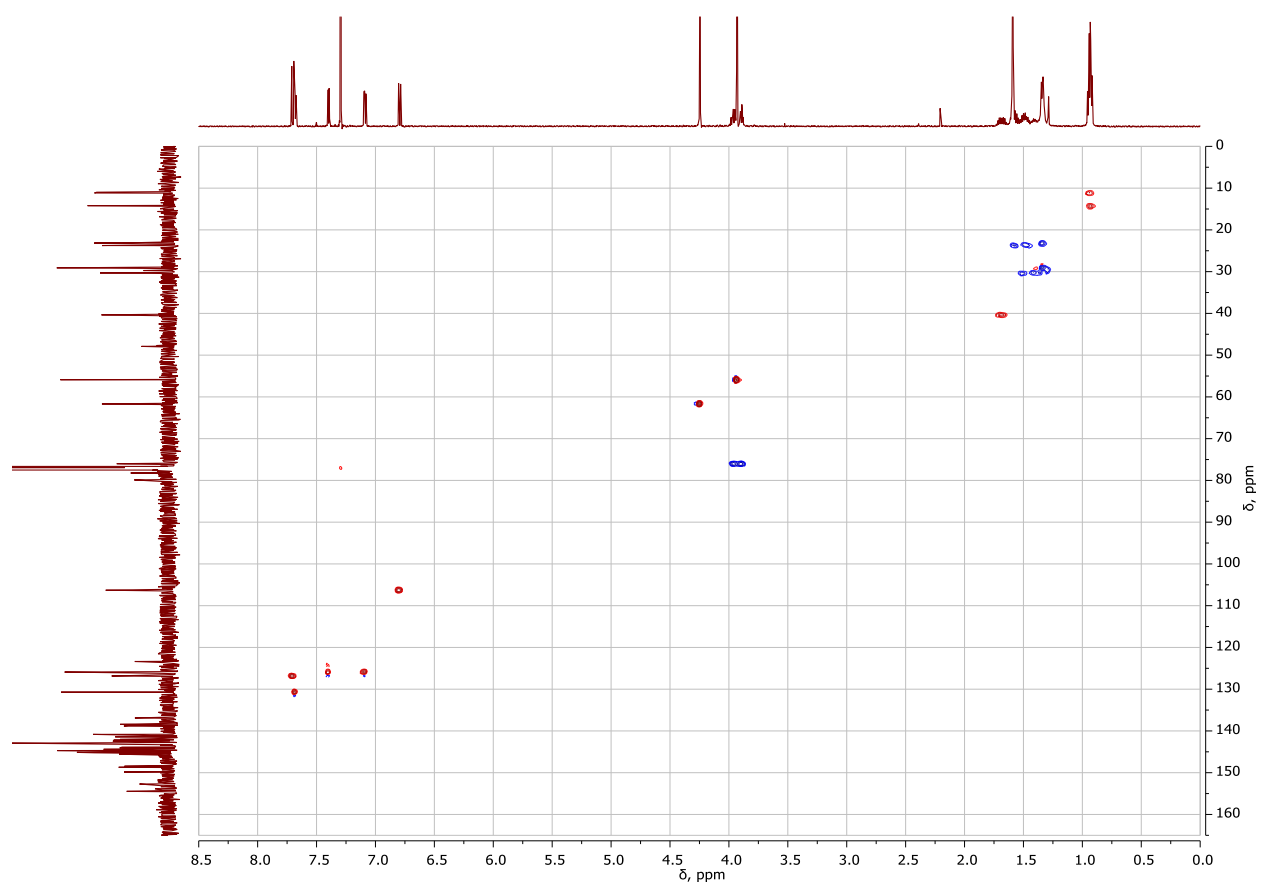

**Figure S16.**  $^1\text{H}$ - $^{13}\text{C}$  HSQC NMR spectrum of the fullerene derivative **F7** ( $\text{CDCl}_3$ ).

a

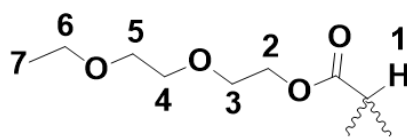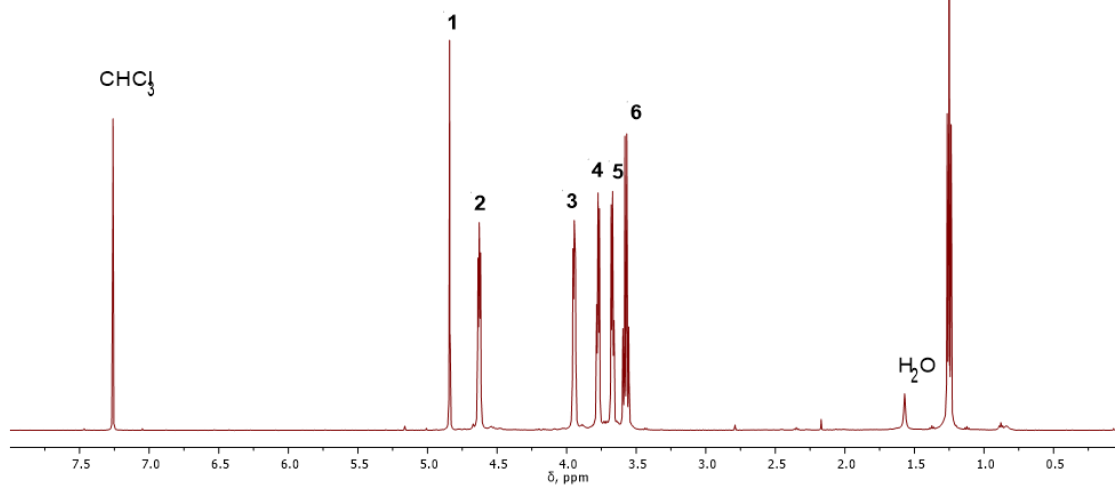

b

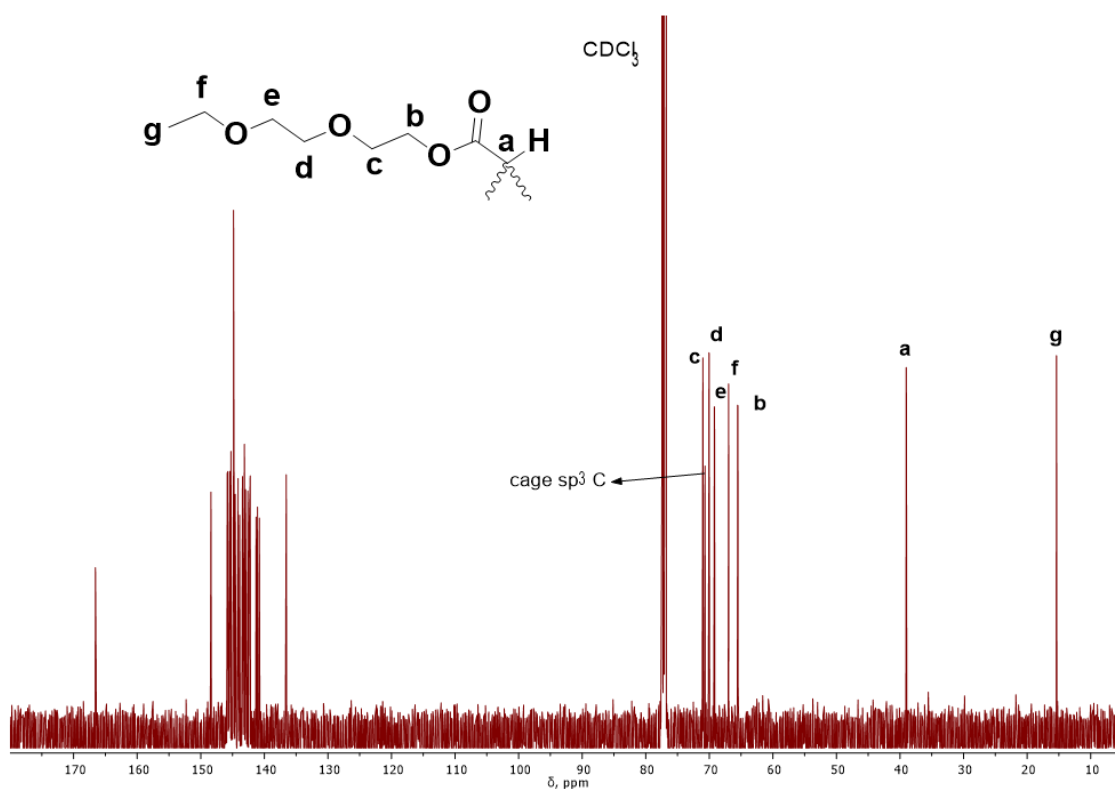

**Figure S17.**  $^1\text{H}$  (a) and  $^{13}\text{C}$  (b) NMR spectra of the fullerene derivative **F8**. Assignment of some signals is shown on the insets.

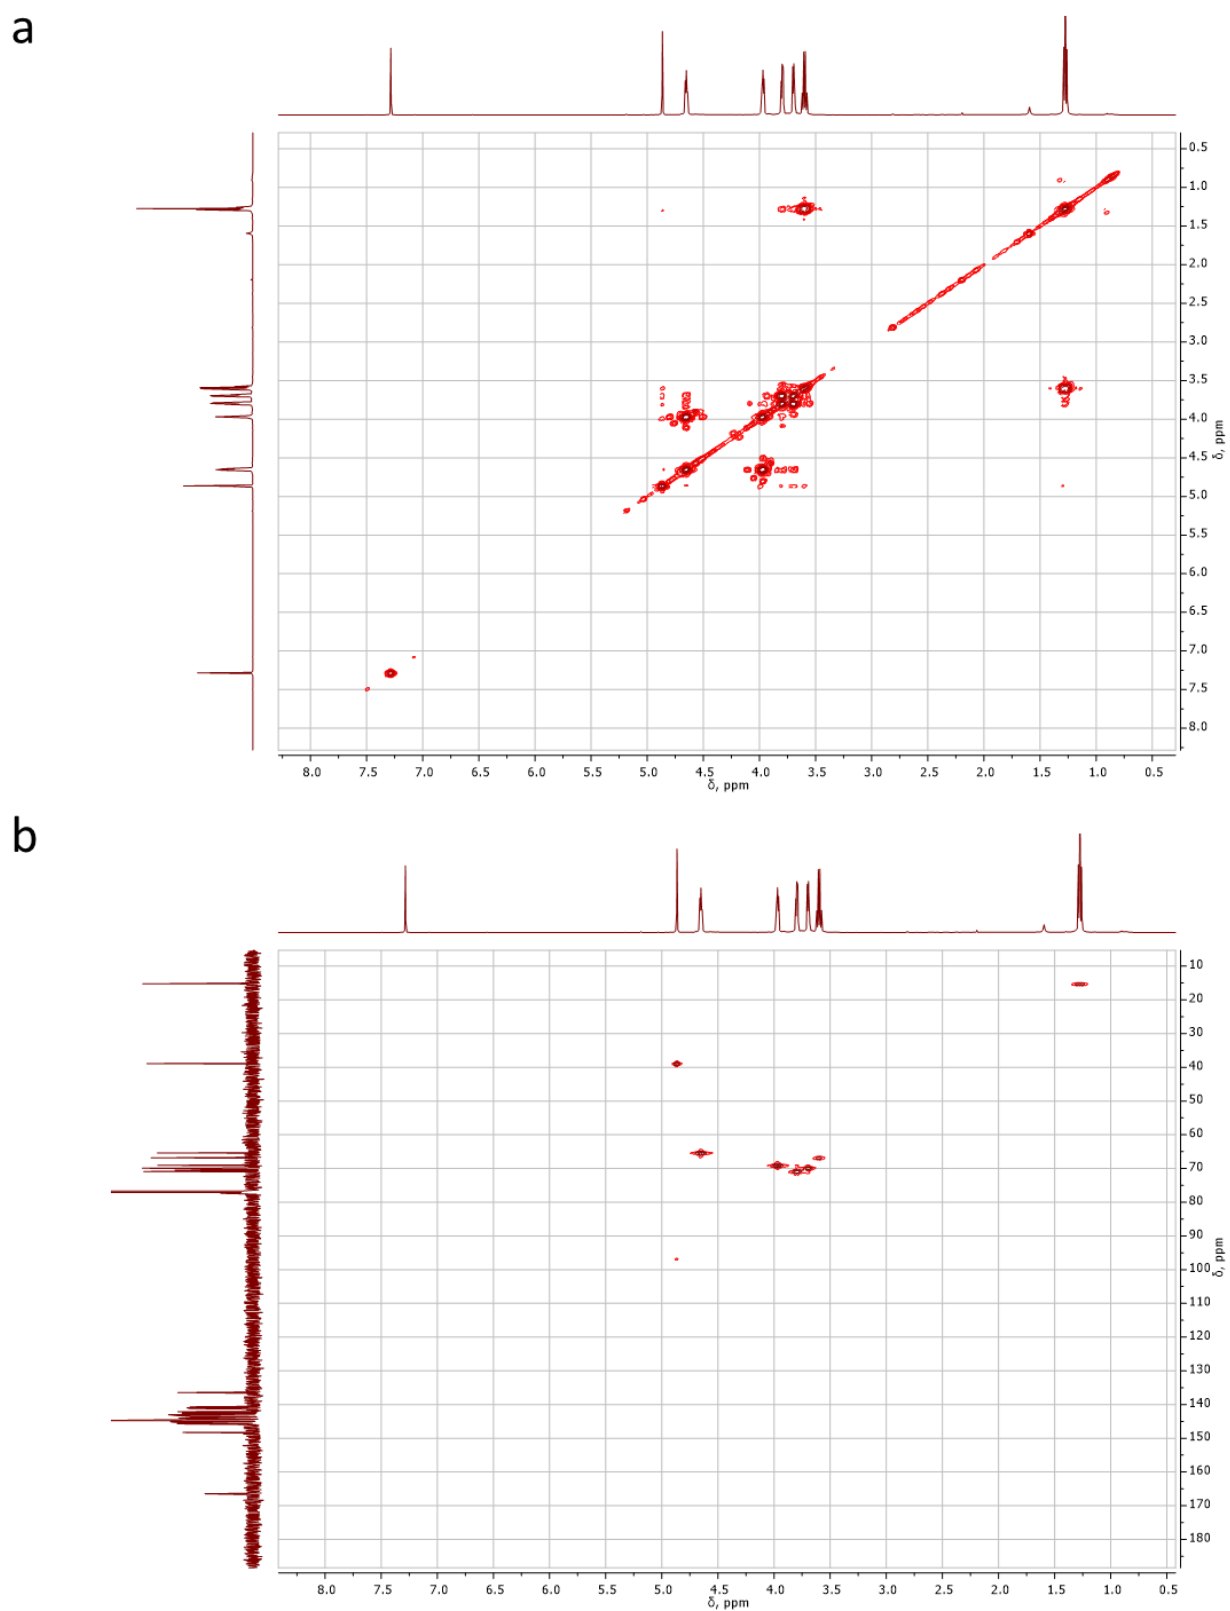

**Figure S18.**  $^1\text{H}$ - $^{13}\text{C}$  HSQC (b) NMR spectra of the fullerene derivative **F8** ( $\text{CDCl}_3$ ).

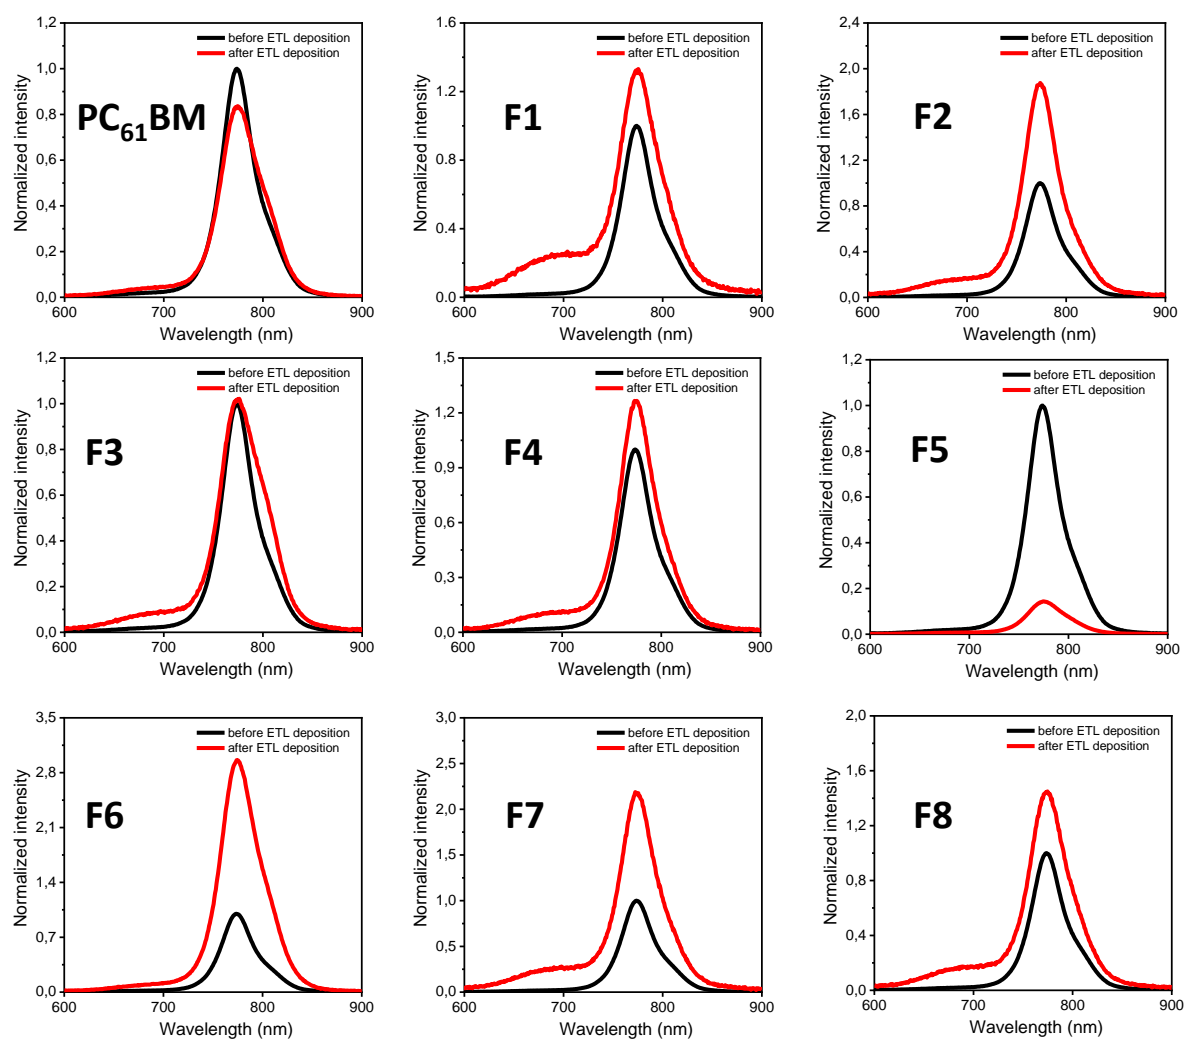

**Figure S19.** PL spectra of the lead halide perovskite films before (black line) and after (red line) deposition of fullerene-based ETLs.

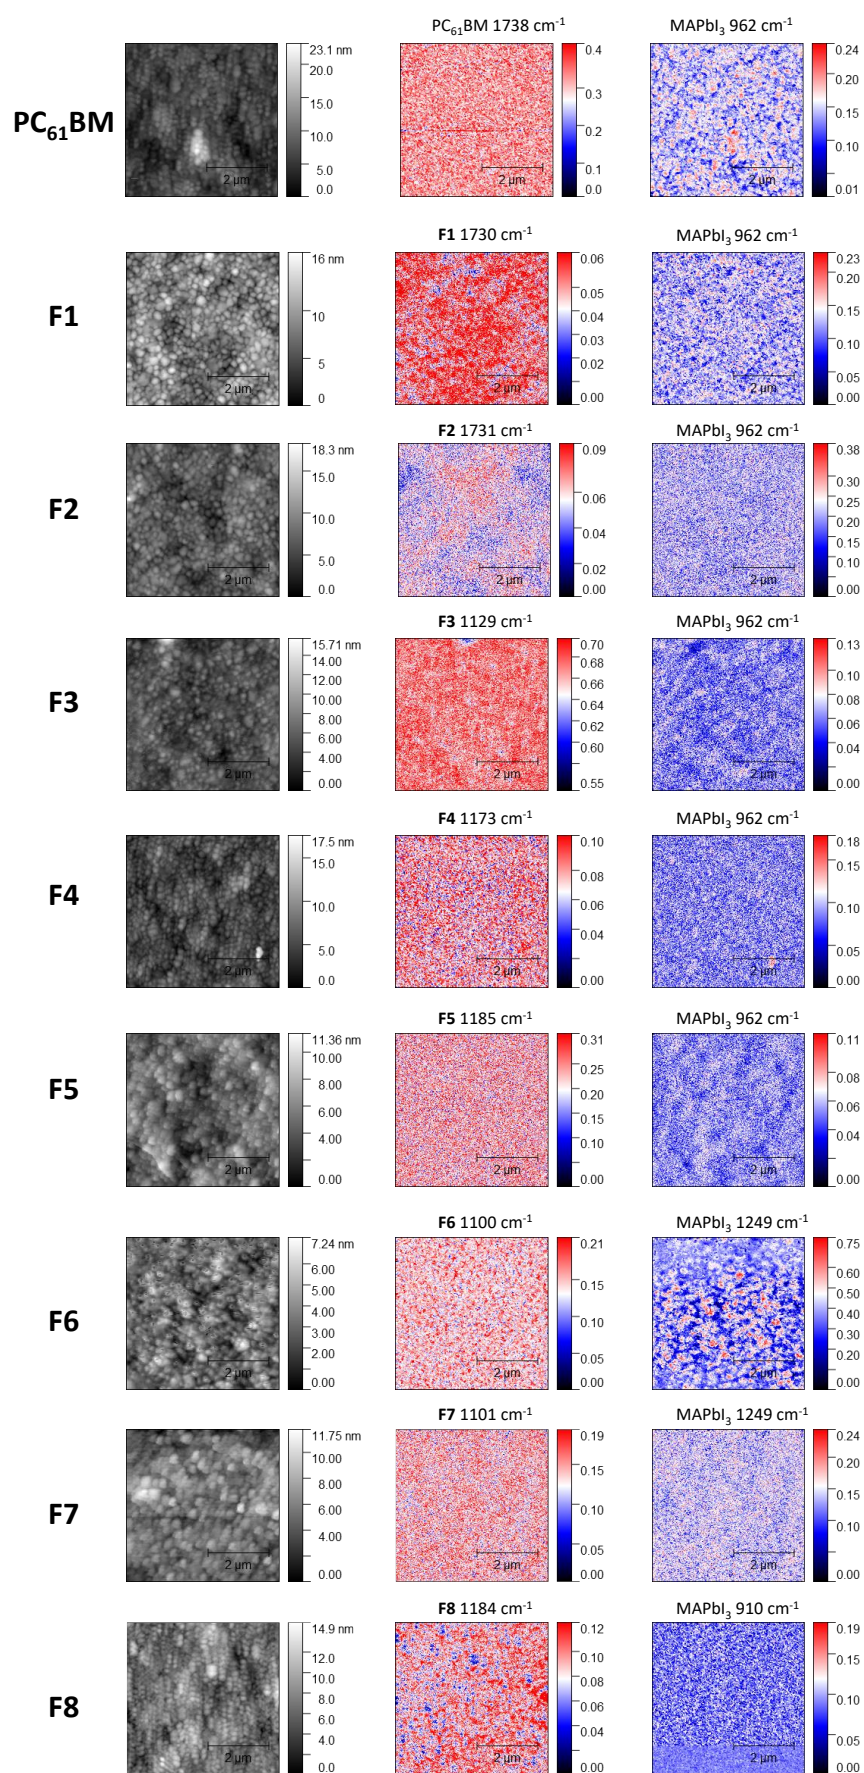

**Figure S20.** Overview of perovskite/ETL bilayer stack morphology: topography (left column) and IR s-SNOM images recorded at the characteristic frequencies of the ETL material (middle column) and perovskite absorber (right column). The used fullerene derivatives are listed on the left side.

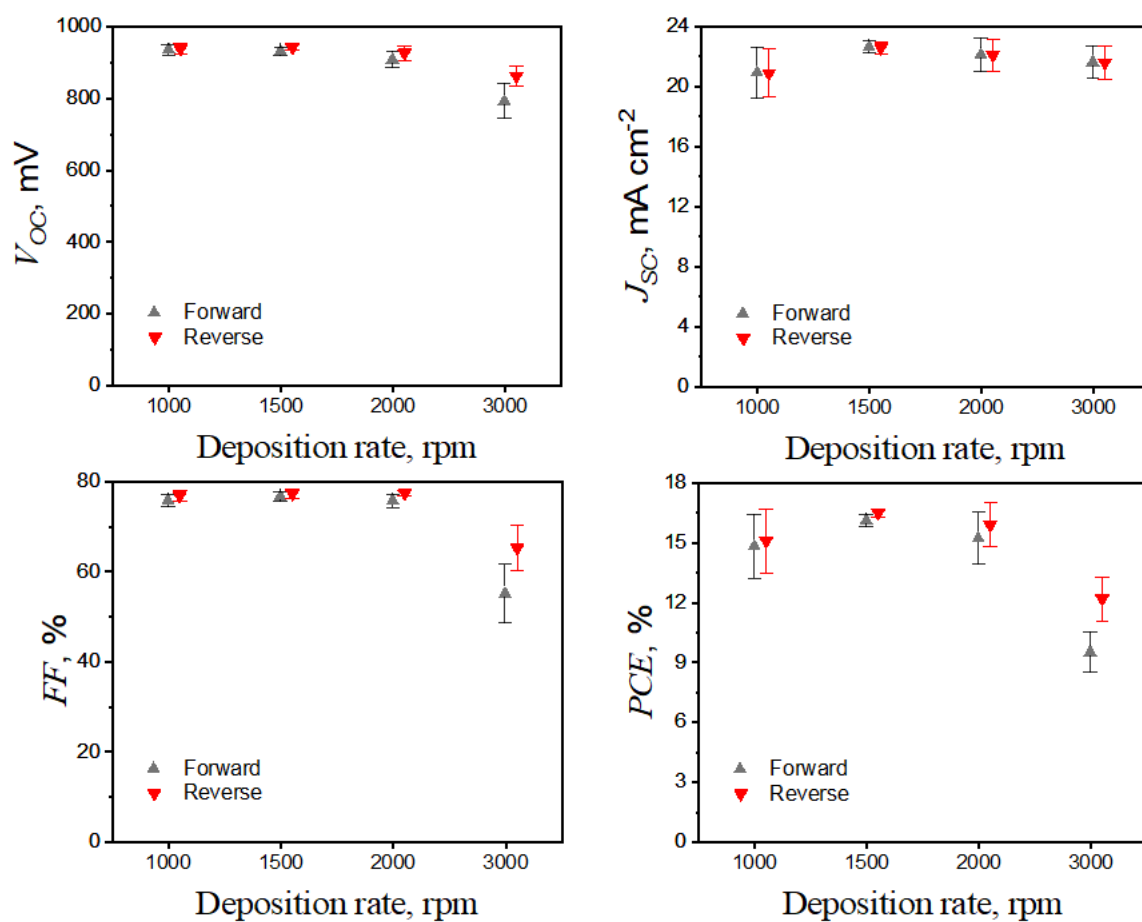

1

**Figure S21.** Dependence of the perovskite solar cell parameters on the deposition rate of the fullerene derivative **F1** (20.2 mg mL<sup>-1</sup> solution in chlorobenzene) used to form electron transport layer in the devices
